# Supplementary material for: Ligand structure and diluent nature in defining improved Am3+ and Cm3+ separation using diglycolamides: a combined solvent extraction and DFT study
Source: Royal Society of Chemistry journal article supplement (doi:10.1039/d3dt03261b), 2024-01-01
Supplement: d3dt03261b1.pdf [file d3dt03261b1.pdf]

## Supporting Information

### Ligand structure and diluent nature in defining improved Am<sup>3+</sup> and Cm<sup>3+</sup> separation using diglycolamides: A combined solvent extraction and DFT studies

A.S. Kanekar, A. Bhattacharyya\* and P.K. Mohapatra\*

Radiochemistry Division, Bhabha Atomic Research Centre, Trombay, Mumbai-400085, India

Email: [arun12@barc.gov.in](mailto:arun12@barc.gov.in) (AB); [mpatra@barc.gov.in](mailto:mpatra@barc.gov.in) (PKM)

### Table of Contents

| Sr. No.    | Topic                                                                                                                                                                                                                                                 | Page No.    |
|------------|-------------------------------------------------------------------------------------------------------------------------------------------------------------------------------------------------------------------------------------------------------|-------------|
| <b>1.</b>  | <b>Synthesis of SO<sub>3</sub>PhBTP</b>                                                                                                                                                                                                               | <b>2</b>    |
| <b>1.1</b> | <b>Scheme 1:</b> Synthesis of SO <sub>3</sub> PhBTP                                                                                                                                                                                                   | <b>2</b>    |
| <b>1.2</b> | Synthesis of dimethyl pyridine-2,6-dicarboxylate                                                                                                                                                                                                      | <b>2</b>    |
| <b>1.3</b> | Synthesis of pyridine-2,6-dicarboxamide                                                                                                                                                                                                               | <b>2</b>    |
| <b>1.4</b> | Synthesis of pyridine-2,6-dicarbonitrile                                                                                                                                                                                                              | <b>3</b>    |
| <b>1.5</b> | Synthesis of pyridine-2,6-dicarbohydrazonamide                                                                                                                                                                                                        | <b>3</b>    |
| <b>1.6</b> | Synthesis of 2,6-bis(5,6-diphenyl-1,2,4-triazin-3-yl)pyridine                                                                                                                                                                                         | <b>4</b>    |
| <b>1.7</b> | Synthesis of 3,3',3'',3'''-(pyridine-2,6-diylbis(1,2,4-triazine-3,5,6-triyl))tetrabenzenesulfonyl chloride                                                                                                                                            | <b>4</b>    |
| <b>1.8</b> | Synthesis of sodium 3,3',3'',3'''-(pyridine-2,6-diylbis(1,2,4-triazine-3,5,6-triyl)) tetra benzenesulfonate (SO <sub>3</sub> PhBTP)                                                                                                                   | <b>4</b>    |
| <b>1.9</b> | <b>Figs. S1-S14: <sup>1</sup>H and <sup>13</sup>C NMR spectra</b>                                                                                                                                                                                     | <b>5-12</b> |
| <b>2.</b>  | <b>Liq-Liq Extraction studies</b>                                                                                                                                                                                                                     | <b>13</b>   |
|            | <b>Fig. S15:</b> Effect of T2EHDGA concentration on the extraction behaviour of Am <sup>3+</sup> and Cm <sup>3+</sup> in absence of SO <sub>3</sub> PhBTP in the aqueous phase; Org. Phase: T2EHDGA in n-dodecane; Aq. Phase : 1.5 M HNO <sub>3</sub> | <b>13</b>   |
|            | <b>Fig. S16:</b> Plot of $\log\left(\frac{D_0}{D} - 1\right)$ vs $\log_{10}[SO_3PhBTP]$ used to determine the $\log\beta_2^S$ values for the Am <sup>3+</sup> /Cm <sup>3+</sup> complexes of SO <sub>3</sub> PhBTP                                    | <b>17</b>   |
| <b>3.</b>  | <b>Computational studies</b>                                                                                                                                                                                                                          | <b>17</b>   |
|            | <b>Fig. S17:</b> Optimized structures (a) TBDGA and (b) TiBDGA showing different bond length in Å                                                                                                                                                     | <b>17</b>   |
|            | <b>Table S1:</b> Cartesian coordinates of the optimized structures of the free ligands (TBDGA and TiBDGA) and their Am <sup>3+</sup> /Cm <sup>3+</sup> complexes                                                                                      | <b>18</b>   |

## Synthesis of SO<sub>3</sub>PhBTP

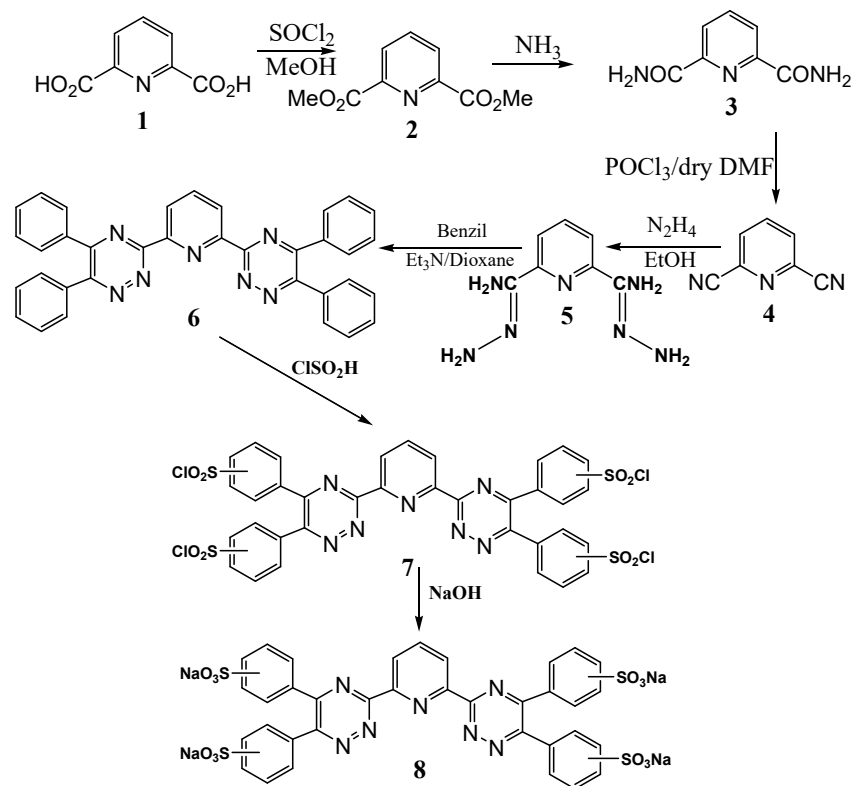

Scheme 1 - Synthesis of SO<sub>3</sub>PhBTP

### Synthesis of dimethyl pyridine-2,6-dicarboxylate (2)

A suspension of pyridine-2,6-dicarboxylic acid (30 mmol) in methanol was slowly added to methanolic Thionyl chloride (75 mmol) at 0°C (ice bath), and the resulting mixture was stirred and refluxed for 14 hrs. The reaction mixture was cooled and quenched with ice-cold water and extracted with chloroform (3 x 50 ml). The organic phases were washed with saturated  $\text{NaHCO}_3$  and dried with  $\text{MgSO}_4$ . The solvent was concentrated under reduced pressure to yield pure pyridine-2,6-dicarboxylate(2) as a white solid. Yield - 88%; mp 120-122°C. <sup>1</sup>H NMR: ( $\text{CDCl}_3$ , 400MHz)  $\delta$ : 4.03 (s,6H), 8.04-8.08 (t,1H), 8.32-8.34 (d, 2H) ppm (Fig. S1). <sup>13</sup>C NMR: ( $\text{CDCl}_3$ , 400 MHz)  $\delta$ : 53.17, 128.03, 138.40, 148.16, 165.00 ppm (Fig. S2).

### Synthesis of pyridine-2,6-dicarboxamide (3)

In a dry round bottom flask, dimethyl pyridine-2,6-dicarboxylate (5.1 mmol) was dissolved in an ammonia solution (1.8ml). The solution temperature was brought up to ~40° C and stirred vigorously for 1 hour. The reacting reaction progress was monitored by TLC analysis. The reaction mass was cooled in an ice bath for 2-3 hours, and the resulting solid was filtered, washed with deionised water followed by vacuum dry obtained white solid of pyridine-2,6-dicarboxamide (3). Yield – 91%; mp 325-330°C. <sup>1</sup>H NMR (DMSO-d<sub>6</sub>, 400MHz) δ:7.71 (s, 2H) 8.12–8.20 (m, 3H)8.91 (s, 2H) ppm (Fig. S3). <sup>13</sup>C NMR (DMSO-d<sub>6</sub>, 400MHz): 124.72, 139.70, 149.4, 165.97ppm (Fig. S4).

#### **Synthesis of pyridine-2,6-dicarbonitrile (4)**

To a stirred solution of Pyridine-2,6-dicarboxamide (3mmol) in 15 ml of dry DMF at 0°C and Phosphorus oxychloride (18 mmol) was added over 5 min dropwise. The reaction mixture was vigorously stirred overnight at room temperature and poured into ice water. The aqueous layer was extracted with DCM (30ml x 3), and the combined organic layer was washed with water (30ml x 3) then dried with anhydrous Na<sub>2</sub>SO<sub>4</sub>; the solvent was removed by rotavapor. The product pyridine-2,6-dicarbonitrile(4) was obtained with 64% yield as a white power; mp 120-123°C.<sup>1</sup>H NMR (CDCl<sub>3</sub>, 400 MHz) δ: 7.94-7.96(d, 2H) 8.08-8.12 (t, 1H) ppm (Fig. S5). <sup>13</sup>C NMR (CDCl<sub>3</sub>, 400MHz): 115.47, 131.18, 135.31, 138.95 ppm (Fig. S6).

#### **Synthesis of pyridine-2,6-dicarbohydrazonamide (5)**

Hydrazine hydrate (10 mL, 75 %) was added to the pyridine-2,6-dicarbonitrile (3.9 mmol) dissolved in ethanol (10ml). The resulting solution was stirred at room temperature for 14-15 days. The crude mixture was poured into ice water (100 ml), and the resulting solid was filtered. The solid residue was dried to give pyridine-2,6-dicarbohydrazonamide as a pale white powder with 45% yield; mp 245°C. <sup>1</sup>H NMR (DMSO-d<sub>6</sub>, 400 MHz) δ: 5.32 (s, 4H), 6.12 (s, 4H), 7.64-7.68 (dd, 1H), 7.81-7.83 (d, 2H) ppm (Fig. S7). <sup>13</sup>C NMR (DMSO-d<sub>6</sub>, 400 MHz) δ: 118.5, 136.4, 144.2, 150.6 ppm (Fig. S8).

### **Synthesis of 2,6-bis(5,6-diphenyl-1,2,4-triazin-3-yl)pyridine (6)**

A solution of benzil (1.57 mmol), Triethylamine (4.6 mL) and pyridine-2,6-dicarbohydrazonamide (2.6 mmol) in 1,4-dioxane (50 mL) was refluxed for 3 days. The reaction mixture was then cooled to room temperature and the solid was filtered and washed with ether. The residue was purified using column chromatography to provide 2,6-bis(5,6-diphenyl-1,2,4-triazin-3-yl) pyridine as yellow solid. Yield – 88 %; mp 309-310°C. <sup>1</sup>H NMR (CDCl<sub>3</sub>, 400 MHz) δ: 7.37-7.49(m, 12H), 7.66-7.68 (m, 4H), 7.79-7.81 (m, 4H), 8.19-8.23 (t, 1H), 8.91-8.93 (d, 2H)ppm (Fig. S9). <sup>13</sup>C NMR (CDCl<sub>3</sub>, 400 MHz) δ: 125.61, 128.54, 128.72,129.58, 129.87, 130.15, 130.89, 135.36, 135.65, 138.39, 153.56, 156.27, 156.53, 160.51ppm (Fig. S10).

### **Synthesis of 3,3',3'',3'''-(pyridine-2,6-diylbis(1,2,4-triazine-3,5,6-triyl))tetrabenzenesulfonyl chloride (7)**

2,6-Bis(5-phenyl-1,2,4-triazin-3-yl)pyridine (0.923 mmol) was dissolved in chlorosulfonic acid (10 mL) in a 50 mL round-bottom flask. The reaction mixture was stirred at 170°C for 3 hours. After cooling to room temperature, the reaction mass was slowly poured into the ice. The solid precipitate was filtered off and washed twice using deionised water to give yellow-green powder in 97% yield; mp above 300°C. <sup>1</sup>H NMR (DMSO-d<sub>6</sub>, 400 MHz) δ: 7.33-7.36 (m, 8H), 7.61-7.73 (m, 4H), 8.19-8.22 (m, 4H), 8.40-8.43 (t, 1H), 8.72-8.74 (d, 2H)ppm (Fig. S11). <sup>13</sup>CNMR (DMSO-d<sub>6</sub>, 400MHz) δ: 126.22, 126.38, 126.90, 127.36, 128.36, 130.50, 130.70, 135.33,135.49, 139.52, 148.80, 148.88, 153.86, 156.31, 156.72, 160.82 ppm (Fig. S12).

### **Synthesis of sodium 3,3',3'',3'''-(pyridine-2,6-diylbis(1,2,4-triazine-3,5,6-triyl)) tetra benzenesulfonate (SO<sub>3</sub>PhBTP) (8)**

A mixture of 3,3',3'',3'''-(pyridine-2,6-diylbis(1,2,4-triazine-3,5,6-triyl))tetrabenzene (0.320 mmol) and NaOH (2.56 mmol) in methanol (30 mL) was stirred and refluxed for 4 h. After cooling to room temperature, the reaction mass was filtered and the resulting solution was neutralized with 2M HCl to 7-8 pH. The product separated was washed with cold methanol

followed by acetone and dried in vacuum to give sodium 3,3',3'',3'''-(pyridine-2,6-diylbis(1,2,4-triazine-3,5,6-triyl)) tetra benzenesulfonate (8) as greenish black solid with 70% yield; mp above 300 °C. <sup>1</sup>H NMR (DMSO-d<sub>6</sub>, 400 MHz) δ: 7.25-7.34 (m, 8H), 7.60-7.75 (m, 4H), 8.26-8.29 (m, 4H), 8.43-8.47 (t, 1H), 8.75-8.77 (d, 2H), ppm (Fig. S13). <sup>13</sup>C NMR (DMSO-d<sub>6</sub>) δ: 126.93, 127.36, 128.18, 130.28, 130.50, 135.18, 135.35, 149.34, 156.36, 156.87 ppm (Fig. S14).

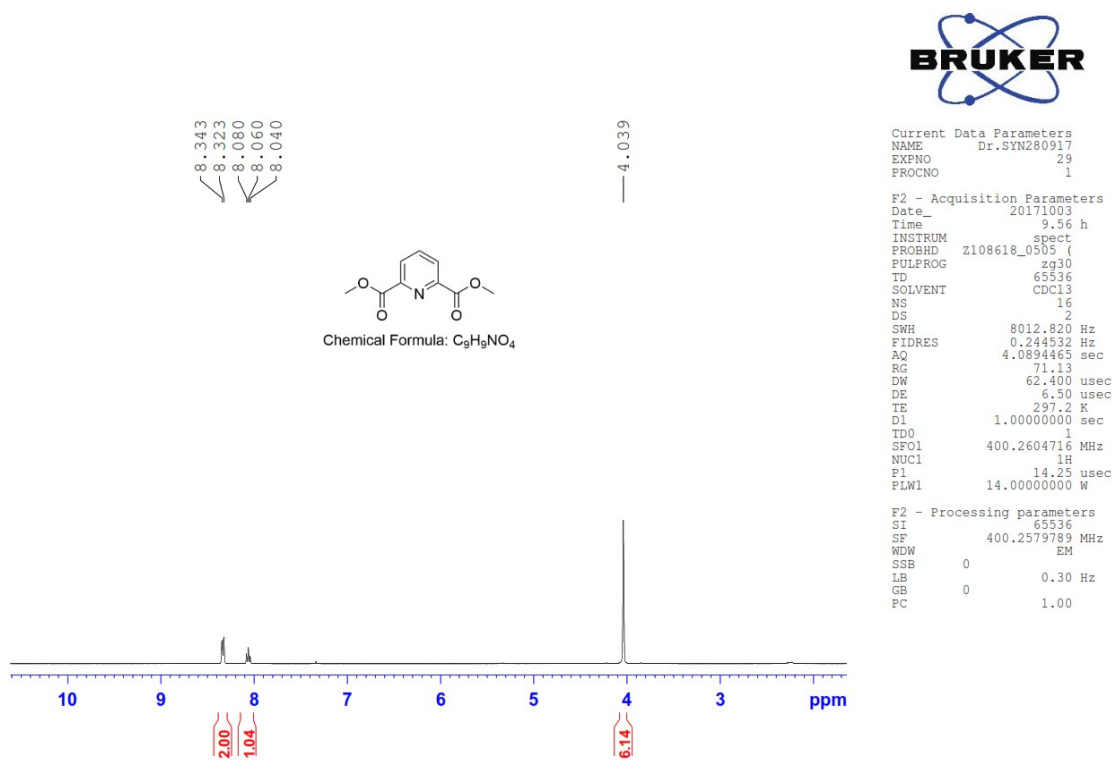

**Fig. S1:** <sup>1</sup>H-NMR spectrum of dimethyl pyridine-2,6-dicarboxylate (2)

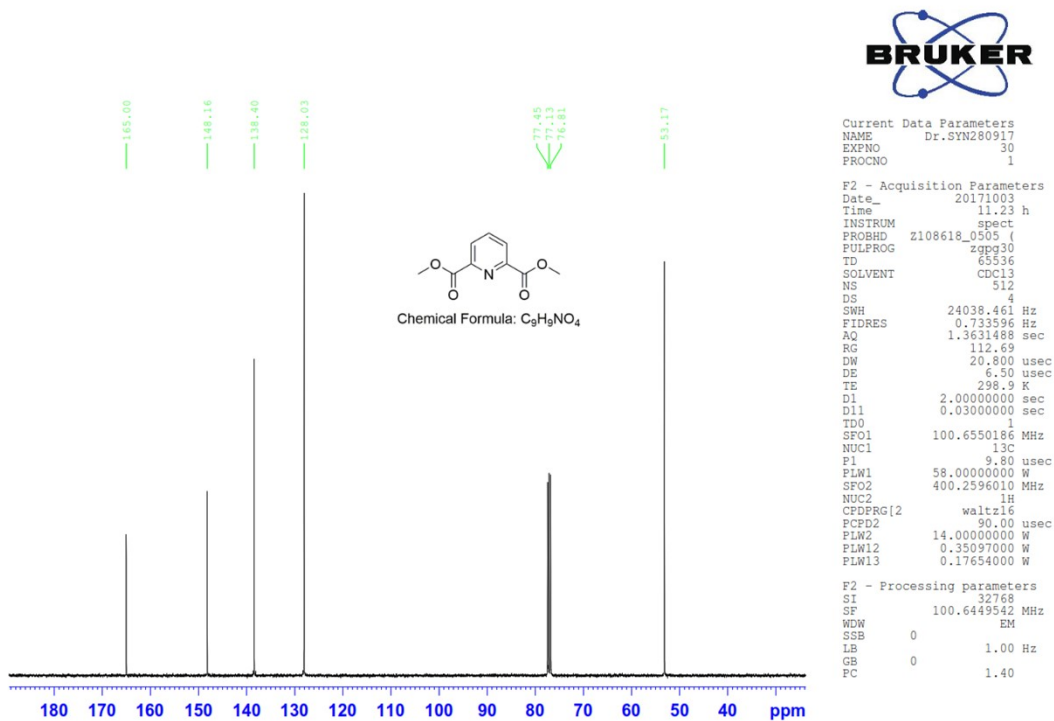

Fig. S2:  $^{13}C$ -NMR spectrum of dimethyl pyridine-2,6-dicarboxylate (2)

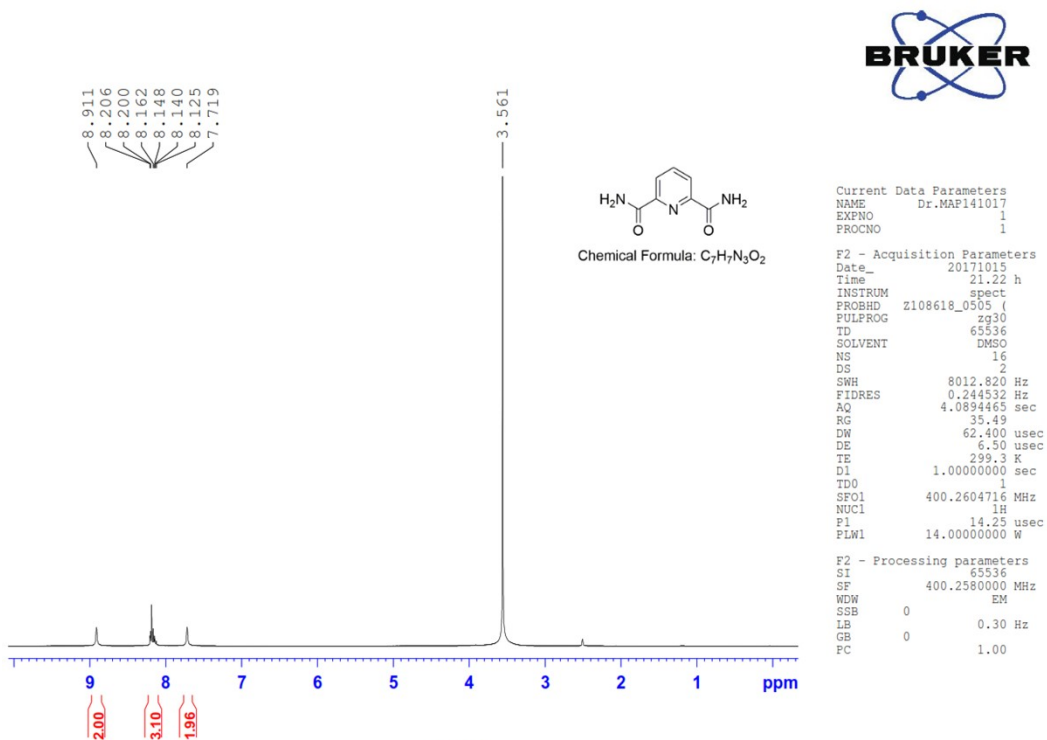

Fig. S3:  $^1H$ -NMR spectrum of pyridine-2,6-dicarboxamide (3)

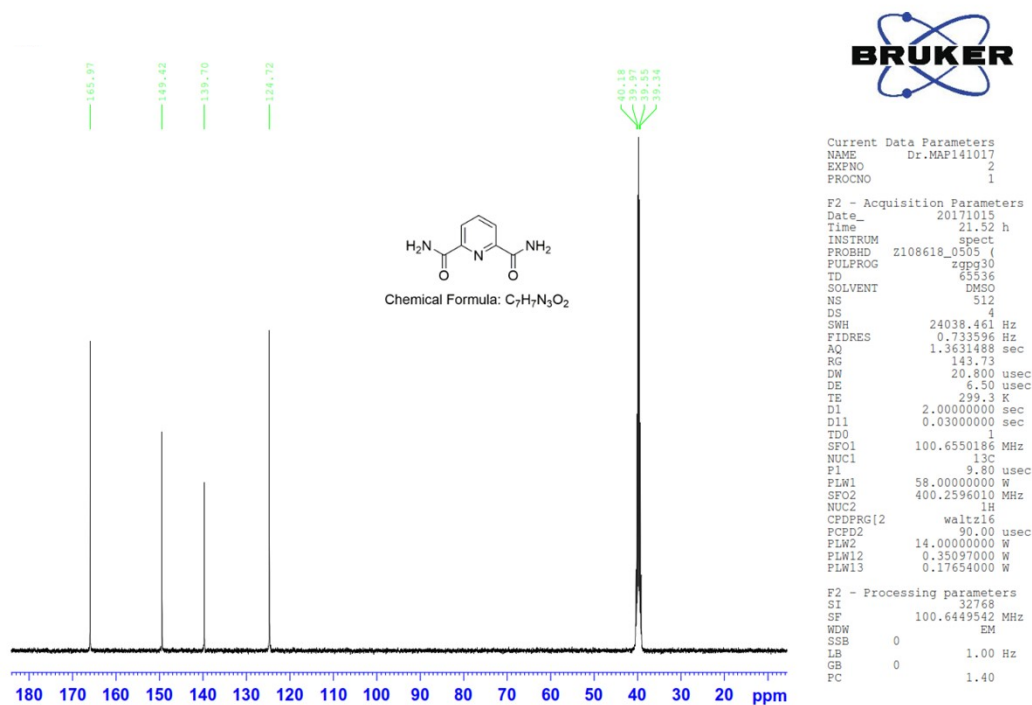

Fig. S4:  $^{13}C$ -NMR spectrum of pyridine-2,6-dicarboxamide (3)

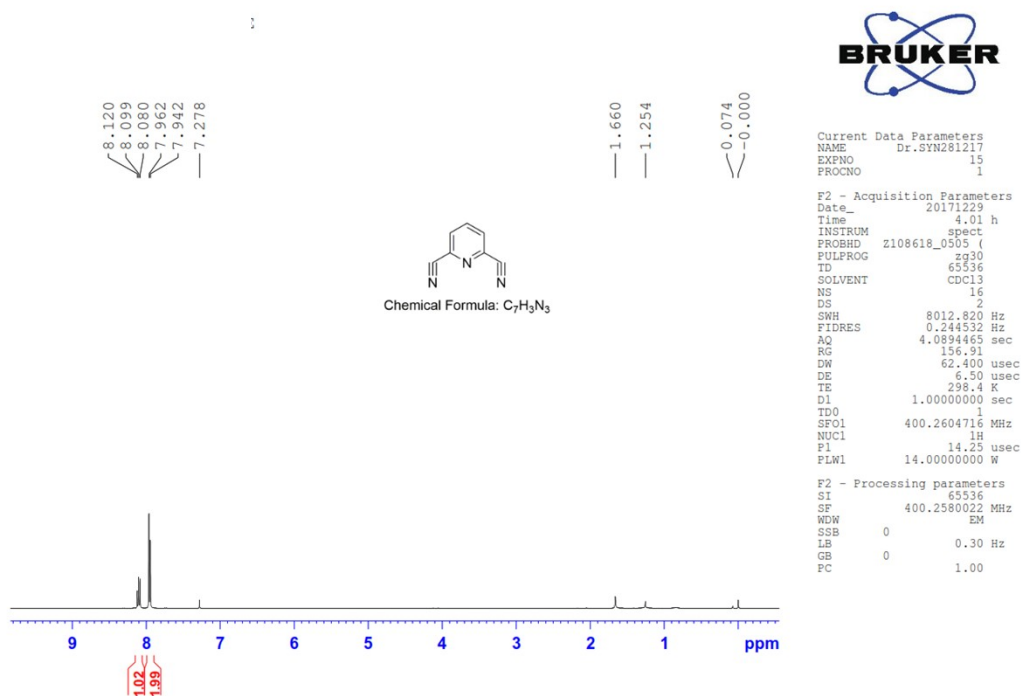

Fig. S5:  $^1H$ -NMR spectrum of pyridine-2,6-dicarbonitrile (4)

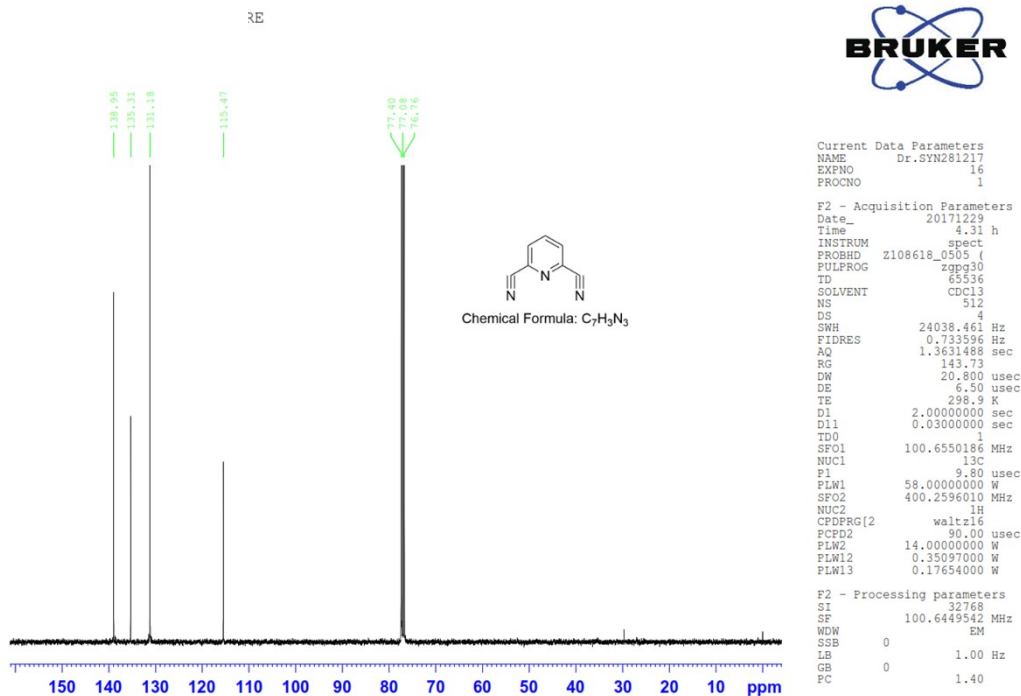

**Fig. S6:** <sup>13</sup>C-NMR spectrum of pyridine-2,6-dicarbonitrile (4)

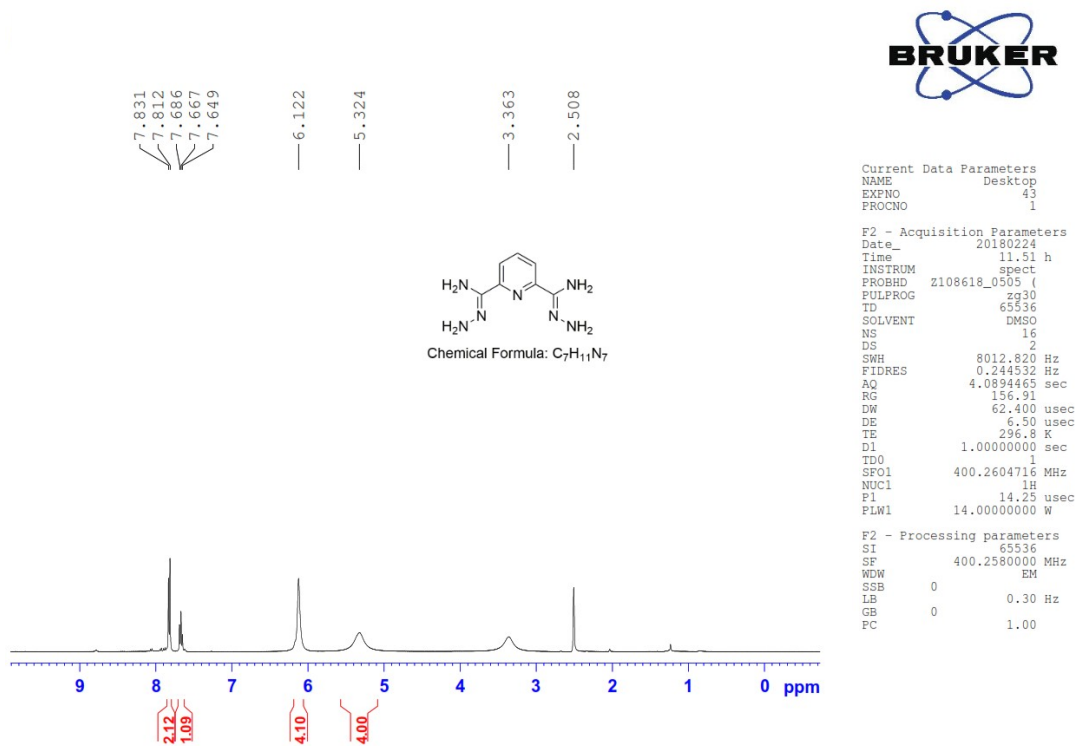

**Fig. S7:** <sup>1</sup>H-NMR spectrum of pyridine-2,6-dicarbohydrazonamide (5)



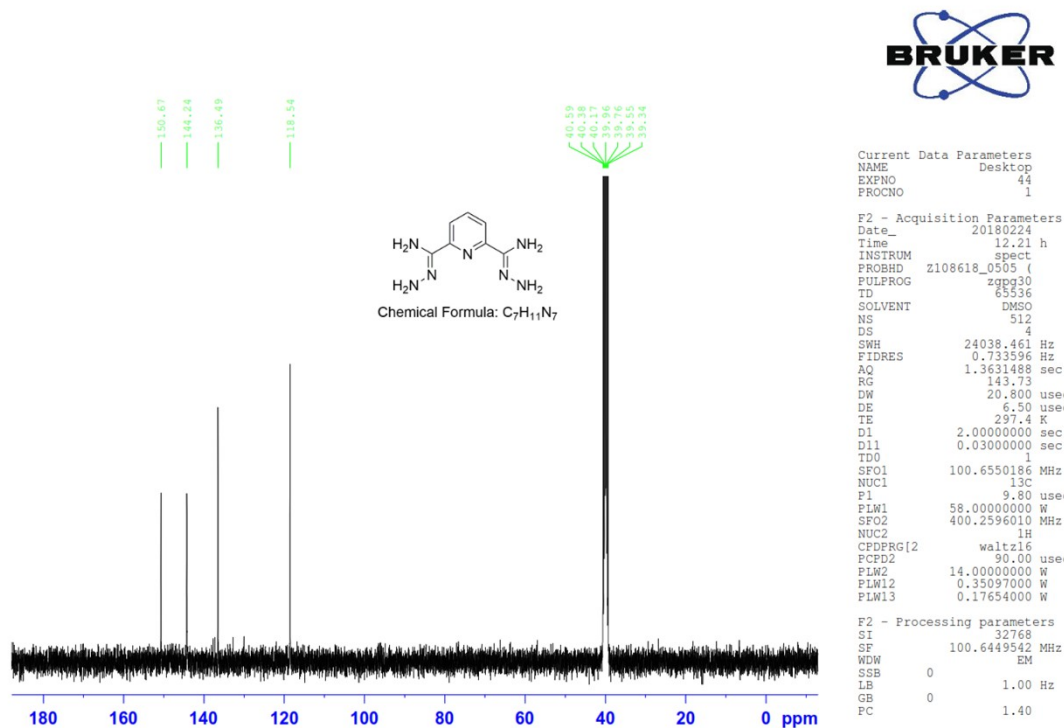

Fig. S8:  $^{13}\text{C}$ -NMR spectrum of pyridine-2,6-dicarbohydrazonamide (5)

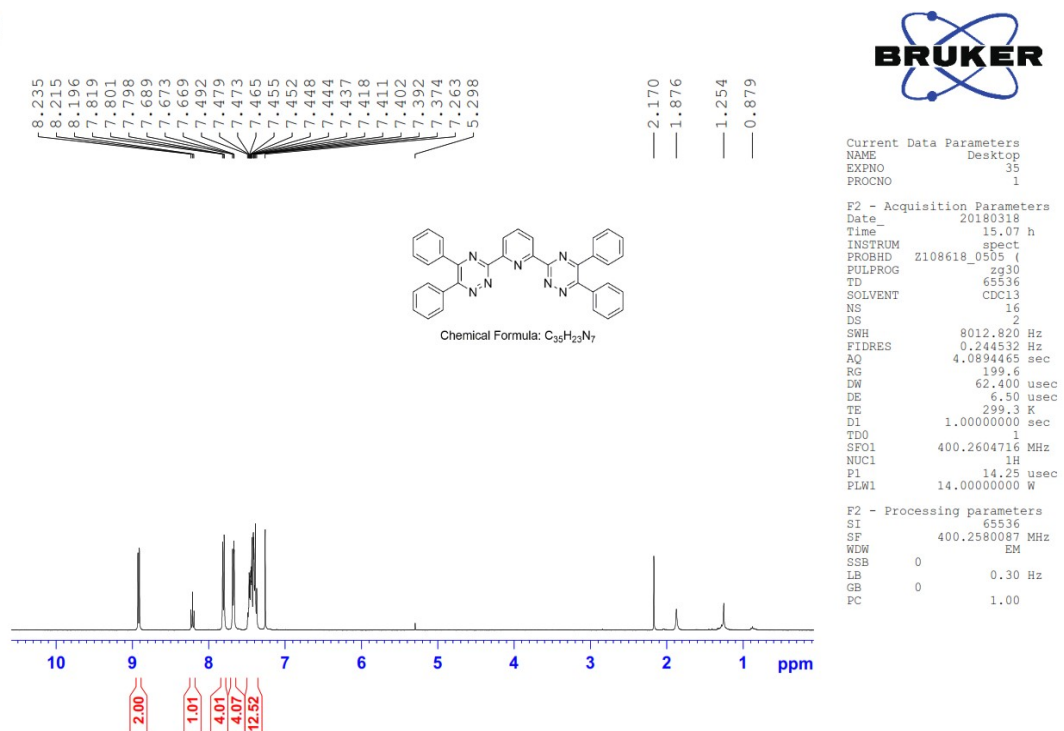

Fig. S9:  $^1\text{H}$ -NMR spectrum of 2,6-bis(5,6-diphenyl-1,2,4-triazin-3-yl) pyridine (6)

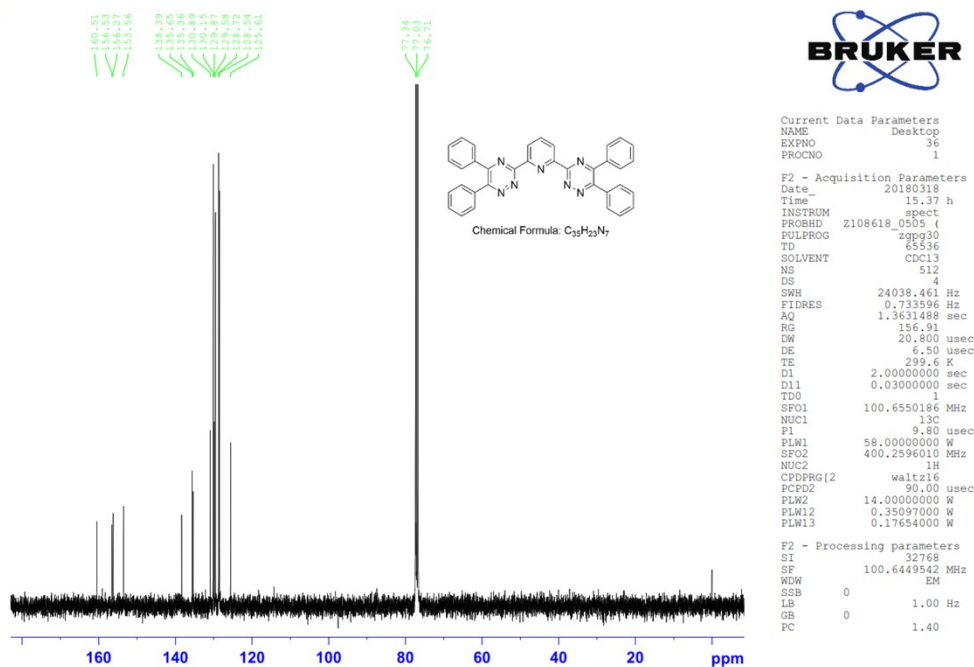

**Fig. S10:**  $^{13}C$ -NMR spectrum of 2,6-bis(5,6-diphenyl-1,2,4-triazin-3-yl) pyridine (6)

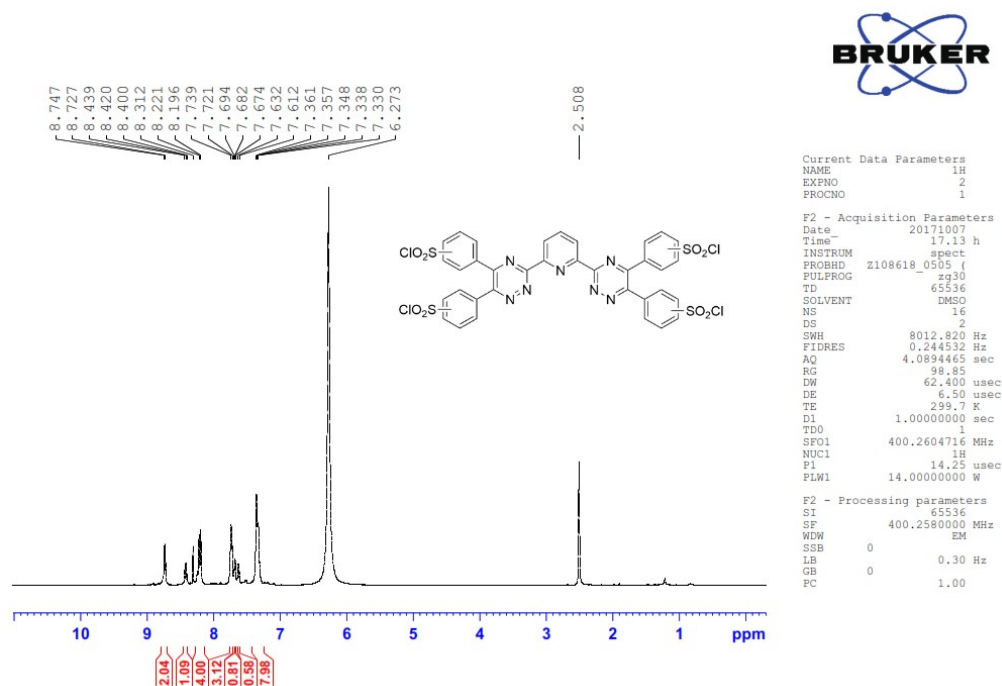

**Fig. S11:**  $^1H$ -NMR spectrum of 3,3',3'',3'''-(pyridine-2,6-diyl)bis(1,2,4-triazine-3,5,6-triyl)tetrabenzene sulfonyl chloride (7)

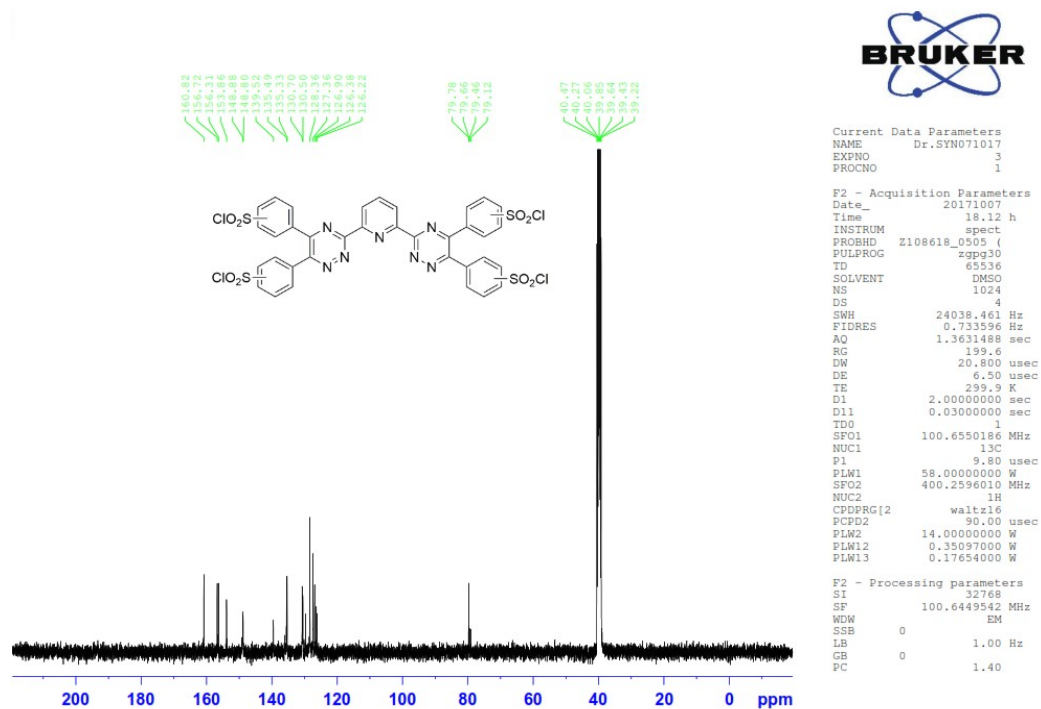

**Fig. S12:**  $^{13}\text{C}$ -NMR spectrum of 3,3',3'',3'''-(pyridine-2,6-diylbis(1,2,4-triazine-3,5,6-triyl))tetrabenzene sulfonyle chloride (7)

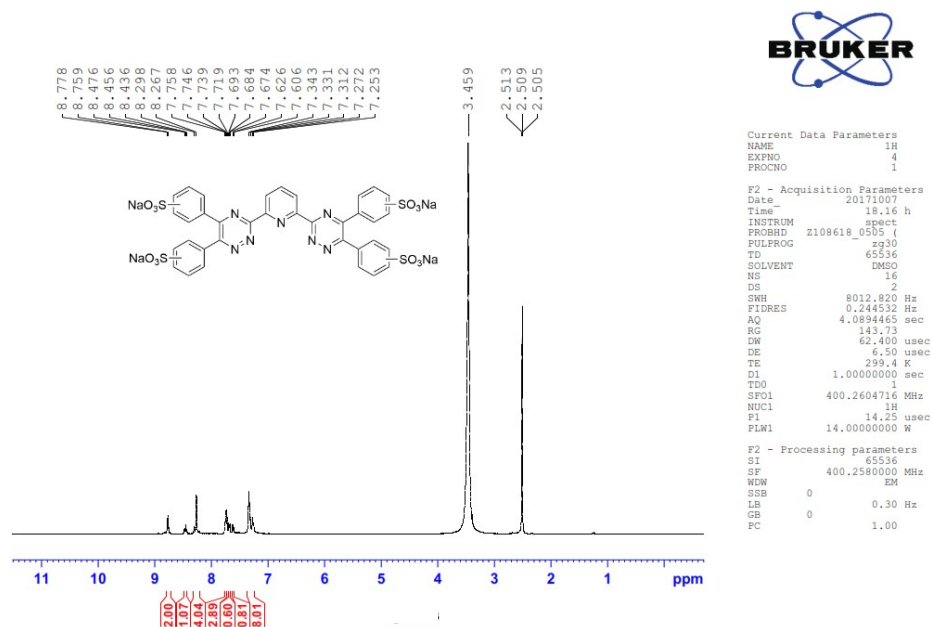

**Fig. S13:**  $^1\text{H}$ -NMR spectrum of 3,3',3'',3'''-(pyridine-2,6-diylbis(1,2,4-triazine-3,5,6-triyl))tetra benzenesulfonate (8)

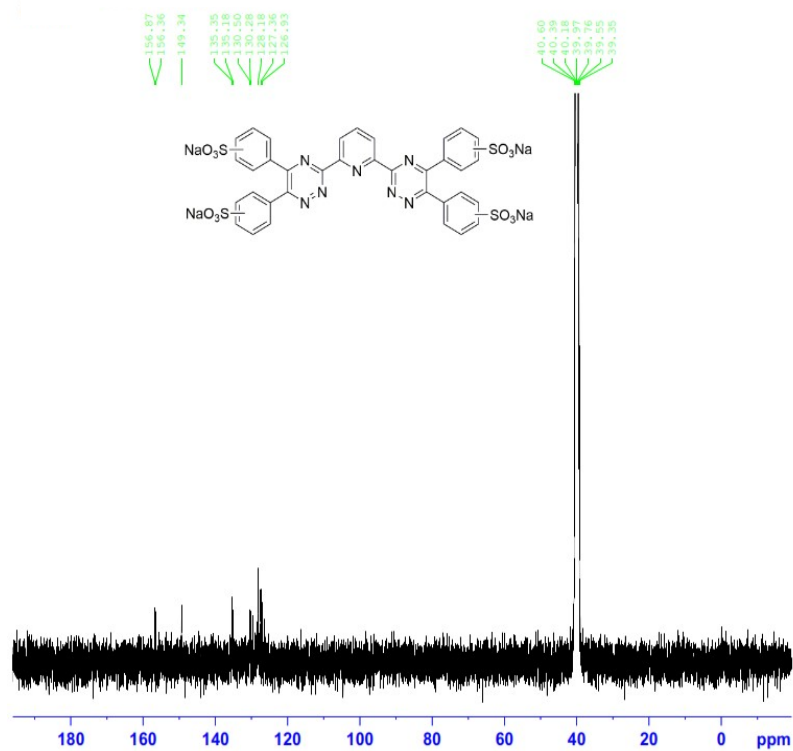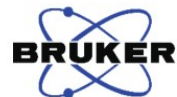

```

Current Data Parameters
NAME          13C
EXPNO        5
PROCNO       1

F2 - Acquisition Parameters
Date_        20171007
Time_        19.15 h
INSTRUM      spect
PROBHD       Z108618 0505 (
PULPROG      zgpg30
TD           65536
SOLVENT      DMSO
NS           1024
DS           4
SWH          24038.461 Hz
FIDRES       0.733596 Hz
AQ           1.3631488 sec
RG           199.6
DW           20.800 usec
DE           6.50 usec
TE           299.8 K
D1           2.0000000 sec
D11          0.0300000 sec
TD0          1
SFO1         100.6550186 MHz
NUC1         13C
P1           9.80 usec
PLW1         58.0000000 W
SFO2         400.2596010 MHz
NUC2         1H
CPDPRG[2]   waltz16
PCPD2        90.00 usec
PLW2         14.0000000 W
PLW12        0.35097000 W
PLW13        0.17654000 W

F2 - Processing parameters
SI           32768
SF           100.6449542 MHz
WDW          EM
SSB          0
LB           1.00 Hz
GB           0
PC           1.40

```

**Fig. S14:** <sup>13</sup>C-NMR spectrum of 3,3',3'',3'''-(pyridine-2,6-diylbis(1,2,4-triazine-3,5,6-triyl))tetra benzenesulfonate (8)

## Liq-Liq Extraction studies

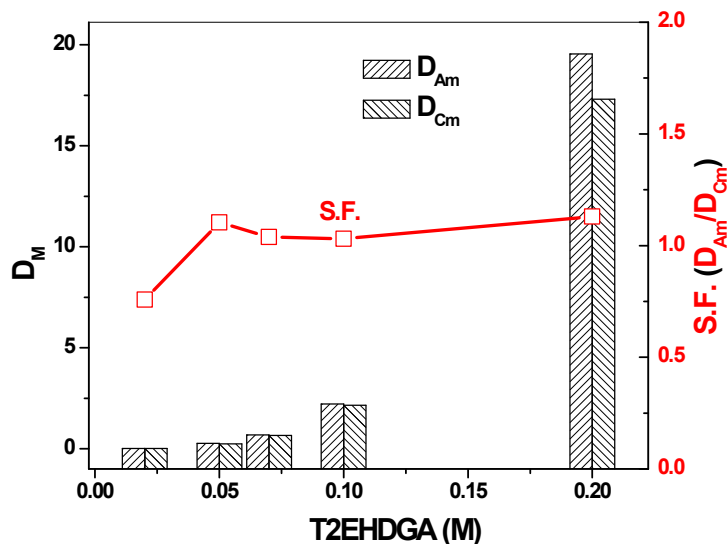

**Fig. S15:** Effect of T2EHDGA concentration on the extraction behaviour of  $Am^{3+}$  and  $Cm^{3+}$  in absence of  $SO_3PhBTP$  in the aqueous phase; Org. Phase: T2EHDGA in n-dodecane; Aq. Phase : 1.5 M  $HNO_3$

The extraction equilibrium for both  $Am^{3+}$  and  $Cm^{3+}$  by both the DGA derivatives in absence of  $SO_3PhBTP$  in the aqueous phase is considered as:

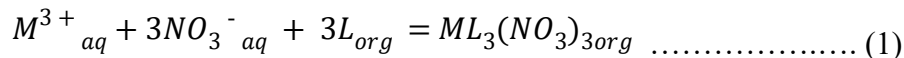

where M = Am or Cm and L is TODGA or T2EHDGA, the subscripts 'aq' and 'org' represent the species in the aqueous and organic phases, respectively. The species in the aqueous phase are represented without any subscript henceforth for simplicity. The two phase binary extraction constant ( $K_{ex}$ ) is defined as:

$$K_{ex} = \frac{[ML_3(NO_3)_3]_{org}}{[M^{3+}][NO_3^{-}]^3[L]_{org}^3} \dots\dots\dots (2)$$

While the distribution ratio is defined as:

$$D_0 = \frac{[M^{3+}]_{org}}{[M^{3+}]} \text{-----} (3)$$

which can be modified by taking into consideration the aqueous complexation by nitrate as follows:

$$D_0 = \frac{[ML_3(NO_3)_3]_{org}}{[M^{3+}](1 + \sum \beta_n^{NO_3} [NO_3]_n)} \text{-----} (4)$$

From eqns. (2) and (4),

$$K_{ex} = \frac{D_0 \{1 + \sum \beta_n^{NO_3} [NO_3]_n\}}{[NO_3^-]^3 [L]_{org}^3} \text{-----} (5)$$

where  $\beta_n^{NO_3}$  is the overall formation constant of the metal ions with nitrate.

In the presence of  $SO_3PhBTP$  (S) in the aqueous phase, the extraction equilibria can be considered as follows,

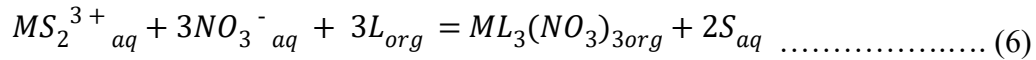

$$K_{ex} = \frac{[ML_3(NO_3)_3]_{org} [S]^2}{[MS_2^{3+}] [NO_3^-]^3 [L]_{org}^3} \text{-----} (7)$$

$$D = \frac{[ML_3(NO_3)_3]_{org}}{[M^{3+}](1 + \sum \beta_n^{NO_3} [NO_3]_n + \sum \beta_n^S [S]_n)} \text{-----} (8)$$

Where  $\beta_n^S$  values are the formation constants of the metal complexes of SO<sub>3</sub>PhBTP for different metal to ligand stoichiometries. However, in the present case, SO<sub>3</sub>PhBTP variation experiments showed the presence of 1:2 complex (Fig. 4b and S16) and the  $\log \beta_2^S$  values of  $6.15 \pm 0.09$  and  $6.45 \pm 0.15$  were used for Am<sup>3+</sup> and Cm<sup>3+</sup>. In presence of such a strongly complexing ligand (7 mM) which formed 1:2 complex in the aqueous phase nitrate complexation can easily be neglected and the equation 8 can be written as

$$D = \frac{[ML_3(NO_3)_3]_{org}}{[M^{3+}](1 + \sum \beta_2^S [S]^2)} \quad \text{----- (9)}$$

As in the present case metal ions are in the tracer quantity ( $<10^{-6}$  M), they are solely present as the 1:2 complex with SO<sub>3</sub>PhBTP (MS<sub>2</sub><sup>3+</sup>) and therefore, equation 9 further simplifies to

$$D = \frac{[ML_3(NO_3)_3]_{org}}{[MS_2^{3+}]} \quad \text{----- (10)}$$

Combining equation (7) and (10) we can get

$$K_{ex} = D \frac{[S]^2}{[NO_3^-]^3 [L]_{org}^3} \quad \text{----- (11)}$$

$$\log K_{ex} = \log D + 2 \log [S] - 3 \log [NO_3^-] - 3 \log [L]_{org} \quad \text{----- (12)}$$

These calculated  $\log K_{ex}$  values are plotted against

The temperature variation experiments were carried out in a wide range of temperature (15-55 °C).

The thermodynamic parameters were calculated from the van't Hoff plots as well as the Gibbs – Helmholtz equation as follows. Free energy change ( $\Delta G_{ex}$ ) for the extraction equilibria can be expressed as

$$\Delta G = -2.303 RT \log K_{ex} \dots\dots\dots (12)$$

and

$$\Delta G = \Delta H - T\Delta S \dots\dots\dots(13)$$

From eqn (10) and (11),

$$\log K_{ex} = - (\Delta H/2.303R) (1000/T) + (\Delta S/2.303R) \dots\dots\dots(14)$$

where R (8.314 JK<sup>-1</sup>mol<sup>-1</sup>) is the universal gas constant.  $\Delta H$  (in kJ.mol<sup>-1</sup>) and  $\Delta S$  (in J.K<sup>-1</sup>.mol<sup>-1</sup>) were therefore calculated from the slope ( $-\Delta H / 2.303 R$ ) and intercept ( $\Delta S / 2.303 R$ ) of the plot of  $\log K_{ex}$  vs 1000/T (Fig 6). The  $\Delta H$  and  $\Delta S$  values calculated from the plots, along with the  $\Delta G$  values are given in Table 3.

Comparing distribution ratio values in absence (equation (3)) and presence of SO<sub>3</sub>PhBTP (equation ((9)), we can write,

$$\frac{D_0}{D} = \{1 + \beta_2^s[S]^2\} \dots\dots\dots (15)$$

$$\log \left( \frac{D_0}{D} - 1 \right) = \log \beta_2^s + 2 \log [S] \dots\dots\dots (16)$$

$\log \beta_2^s$  values were, therefore, determined from the intercept of the plot of  $\log \left( \frac{D_0}{D} - 1 \right)$  vs  $\log [S]$  as shown in Fig. S1.



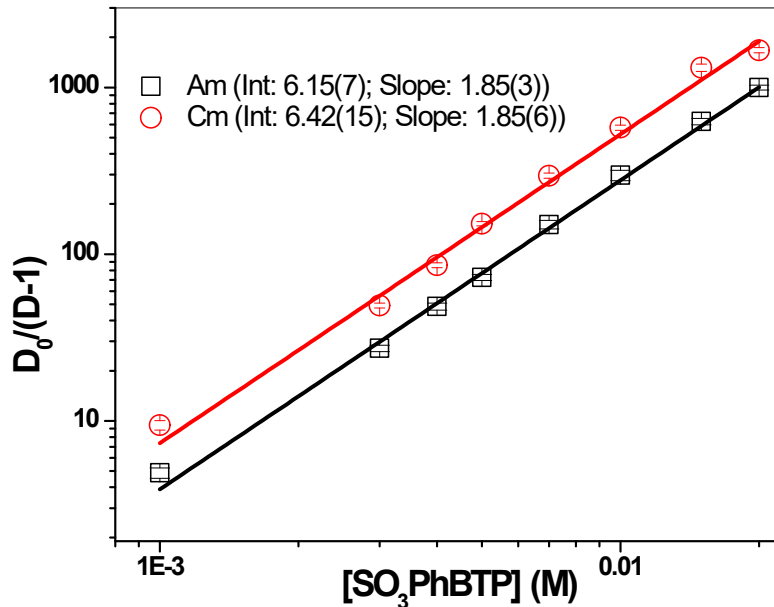

**Fig. S16:** Plot of  $\log\left(\frac{D_0}{D} - 1\right)$  vs  $\log_{10}[\text{SO}_3\text{PhBTP}]$  used to determine the  $\log\beta_2^S$  values for the  $\text{Am}^{3+}/\text{Cm}^{3+}$  complexes of  $\text{SO}_3\text{PhBTP}$ ; Org. Phase 0.2 M TODGA or T2EHDGA in n-dodecane; Aq. Phase: 1.5 M  $\text{HNO}_3$  containing varying concentration of  $\text{SO}_3\text{PhBTP}$

**Computational studies:**

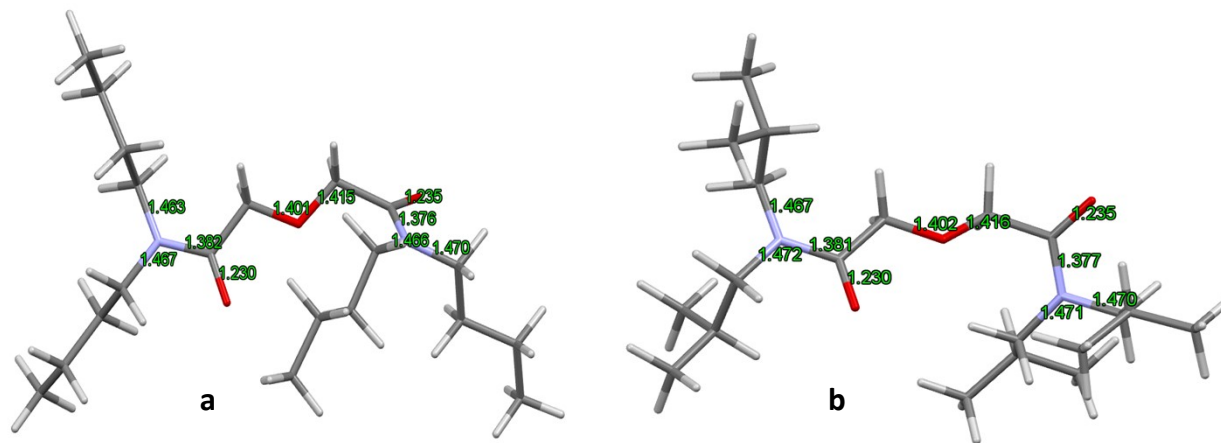

**Fig. S17:** Optimized structures (a) TBDGA and (b) TiBDGA showing different bond length in Å

**Table S1:** Cartesian coordinates of the optimized structures of the free ligands (TBDGA and TiBDGA) and their Am<sup>3+</sup>/Cm<sup>3+</sup> complexes

TBDGA

|   |            |             |            |
|---|------------|-------------|------------|
| C | -3.8346370 | -2.8084149  | -3.3900037 |
| C | -3.1563725 | -3.9170095  | -2.5624190 |
| H | -3.8986115 | -4.7179387  | -2.2944512 |
| H | -2.4028917 | -4.3751421  | -3.2462887 |
| O | -2.5456062 | -3.3842443  | -1.4022189 |
| C | -1.7869452 | -4.3256372  | -0.6948124 |
| H | -2.4163440 | -5.2007197  | -0.3797951 |
| H | -0.9668594 | -4.7412126  | -1.3401388 |
| C | -1.1778982 | -3.6304912  | 0.5436441  |
| N | -0.4078870 | -4.4220260  | 1.3746194  |
| N | -4.7259025 | -1.9707912  | -2.7600108 |
| O | -1.3712847 | -2.4353459  | 0.7582325  |
| O | -3.5777415 | -2.7130364  | -4.5940333 |
| C | 0.2159192  | -3.7849991  | 2.5401649  |
| H | 0.1440959  | -4.4834748  | 3.4053082  |
| H | -0.3887600 | -2.8856040  | 2.7784499  |
| C | -0.2010902 | -5.8595879  | 1.1949712  |
| H | -0.2526527 | -6.1125911  | 0.1146910  |
| H | 0.8440447  | -6.0934270  | 1.5018173  |
| C | 1.6806533  | -3.3769671  | 2.3054719  |
| H | 2.2851627  | -4.2760518  | 2.0344877  |
| H | 1.7202092  | -2.6928547  | 1.4272027  |
| C | 2.3094306  | -2.6887257  | 3.5277216  |
| H | 2.2110017  | -3.3534823  | 4.4190124  |
| H | 1.7247700  | -1.7697100  | 3.7683772  |
| C | 3.7852814  | -2.3209062  | 3.3263740  |
| H | 4.2019758  | -1.8070103  | 4.2206144  |
| H | 4.4066374  | -3.2262093  | 3.1393798  |
| H | 3.9178674  | -1.6402113  | 2.4552357  |
| C | -1.1776691 | -6.7485813  | 1.9892122  |
| H | -2.2218956 | -6.5204062  | 1.6714418  |
| H | -1.1196923 | -6.4807523  | 3.0700035  |
| C | -0.8960563 | -8.2496153  | 1.8160843  |
| H | 0.1581096  | -8.4625113  | 2.1137266  |
| H | -0.9640299 | -8.5146371  | 0.7342089  |
| C | -1.8454437 | -9.1447916  | 2.6232209  |
| H | -2.9064066 | -8.9835462  | 2.3261389  |
| H | -1.6140653 | -10.2220750 | 2.4712449  |
| H | -1.7694353 | -8.9349226  | 3.7141688  |
| C | -5.3158349 | -0.9070778  | -3.5857002 |

|   |            |            |            |
|---|------------|------------|------------|
| H | -6.2621505 | -0.5906192 | -3.0936980 |
| H | -5.5727459 | -1.3498445 | -4.5730257 |
| C | -4.4000974 | 0.3088915  | -3.8104353 |
| H | -3.4580789 | -0.0480634 | -4.2825310 |
| H | -4.1203625 | 0.7547019  | -2.8282125 |
| C | -5.0509742 | 1.3792401  | -4.7012641 |
| H | -5.3160358 | 0.9250687  | -5.6852154 |
| H | -6.0171222 | 1.7056803  | -4.2466373 |
| C | -4.1562537 | 2.6048417  | -4.9287790 |
| H | -3.1942711 | 2.3173447  | -5.4102247 |
| H | -4.6507108 | 3.3556322  | -5.5847092 |
| H | -3.9082146 | 3.1091880  | -3.9672086 |
| C | -5.1611350 | -2.0939554 | -1.3650845 |
| H | -6.2737224 | -1.9993165 | -1.3520268 |
| H | -4.9296374 | -3.1183532 | -1.0106800 |
| C | -4.5362355 | -1.0802767 | -0.3925685 |
| H | -3.4319630 | -1.2044453 | -0.4245305 |
| H | -4.7717122 | -0.0431924 | -0.7284637 |
| C | -5.0298390 | -1.2722565 | 1.0496066  |
| H | -4.8213836 | -2.3218338 | 1.3655550  |
| H | -6.1396938 | -1.1519494 | 1.0909669  |
| C | -4.3643445 | -0.3100289 | 2.0421447  |
| H | -4.7416626 | -0.4656609 | 3.0776878  |
| H | -3.2624849 | -0.4615617 | 2.0511427  |
| H | -4.5595730 | 0.7525140  | 1.7697921  |

#### TiBDGA

|   |            |           |            |
|---|------------|-----------|------------|
| O | -1.4994429 | 1.3586253 | 1.5661596  |
| C | -1.3924525 | 2.5686306 | 1.7309455  |
| N | -2.0911704 | 3.2448253 | 2.7203021  |
| C | -1.9507766 | 4.6766857 | 2.9924512  |
| C | -0.8009991 | 5.0885127 | 3.9496202  |
| C | -0.7510797 | 6.6225803 | 4.0558528  |
| O | 0.2120604  | 2.5870779 | -0.0512157 |
| C | 1.0269188  | 3.3072187 | -0.9321163 |
| C | 1.7865582  | 2.3132487 | -1.8391631 |
| N | 2.6822523  | 2.8665246 | -2.7418303 |
| C | 3.0103526  | 4.2920424 | -2.8031757 |
| C | 4.1313741  | 4.7832101 | -1.8494545 |
| C | 4.2775484  | 6.3095414 | -1.9757436 |
| O | 1.5821899  | 1.1061427 | -1.7771796 |
| C | -0.4946158 | 3.4302356 | 0.8148000  |
| C | -3.0079346 | 2.4353120 | 3.5375948  |
| C | -4.3498465 | 2.0851656 | 2.8527014  |
| C | -5.1565788 | 1.1414323 | 3.7602033  |

|   |            |            |            |
|---|------------|------------|------------|
| C | 3.3406512  | 1.9281604  | -3.6632531 |
| C | 2.4530568  | 1.4380687  | -4.8320838 |
| C | 3.2268378  | 0.4012140  | -5.6626808 |
| H | 0.1552038  | 4.7450977  | 3.4889625  |
| H | 3.8047905  | 4.5552806  | -0.8072320 |
| H | -1.1425905 | 4.1499085  | 0.2412032  |
| H | 0.2055181  | 4.0602659  | 1.4247473  |
| H | -2.9147589 | 5.0343168  | 3.4181111  |
| H | -1.8320476 | 5.2245678  | 2.0311867  |
| H | -1.6897292 | 7.0239901  | 4.5032646  |
| H | -0.6221649 | 7.1025792  | 3.0593784  |
| H | -3.2023736 | 2.9884255  | 4.4825404  |
| H | -2.4855702 | 1.4892389  | 3.7972809  |
| H | -4.0925029 | 1.5309257  | 1.9221160  |
| H | -5.4139893 | 1.6310081  | 4.7289408  |
| H | -4.5874619 | 0.2130618  | 3.9900488  |
| H | 1.7492901  | 3.9598967  | -0.3731069 |
| H | 0.4149830  | 3.9994735  | -1.5744856 |
| H | 2.0911549  | 4.8899994  | -2.6141501 |
| H | 3.3035761  | 4.5256276  | -3.8513557 |
| H | 4.5945885  | 6.5985129  | -3.0044781 |
| H | 3.3204541  | 6.8359647  | -1.7589676 |
| H | 3.6697411  | 1.0444430  | -3.0744312 |
| H | 4.2485425  | 2.4272844  | -4.0662851 |
| H | 1.5796124  | 0.9269607  | -4.3695075 |
| H | 3.5647608  | -0.4532917 | -5.0348007 |
| H | 4.1298722  | 0.8534715  | -6.1359743 |
| H | 0.0932885  | 6.9519241  | 4.7007949  |
| H | -6.1114990 | 0.8391266  | 3.2756947  |
| H | 5.0436744  | 6.6982542  | -1.2691542 |
| H | 2.5936058  | -0.0115810 | -6.4793612 |
| C | 5.4729387  | 4.0700639  | -2.0792040 |
| H | 5.3851783  | 2.9714428  | -1.9352595 |
| H | 5.8584930  | 4.2544556  | -3.1090008 |
| H | 6.2421592  | 4.4393523  | -1.3645696 |
| C | 1.9362415  | 2.5899011  | -5.7079146 |
| H | 2.7752631  | 3.1356017  | -6.2009868 |
| H | 1.2691431  | 2.2089188  | -6.5136186 |
| H | 1.3490264  | 3.3255442  | -5.1145356 |
| C | -0.9074441 | 4.4334753  | 5.3357907  |
| H | -1.8489788 | 4.7306420  | 5.8539605  |
| H | -0.8860551 | 3.3242836  | 5.2691176  |
| H | -0.0580571 | 4.7451878  | 5.9839368  |
| C | -5.1639754 | 3.3310676  | 2.4704302  |
| H | -6.1067495 | 3.0462055  | 1.9515831  |
| H | -5.4472081 | 3.9255113  | 3.3712735  |

H -4.5976932 3.9974256 1.7823603

Am(TBDGA)33+

C -5.0909299 -4.2683953 4.3971062  
C -3.8566979 -3.3864562 4.1365377  
C -2.9335498 -3.9821010 3.0602556  
N -1.6997611 -3.2030094 2.8189133  
C -1.5606439 -2.3218253 1.8165874  
C -2.7349164 -2.1104477 0.8523640  
O -2.3674267 -1.0556832 -0.0233137  
C -3.3211089 -0.7909208 -1.0388614  
C -2.7703968 0.3622240 -1.8856643  
N -3.5562268 0.8884920 -2.8377193  
C -4.9512762 0.4521322 -3.0715482  
C -6.0045059 1.2864926 -2.3222626  
C -7.4428336 0.8544121 -2.6633062  
C -0.5736474 -3.4375551 3.7473036  
C 0.3095924 -4.6293331 3.3422420  
C 1.4336190 -4.8961732 4.3577815  
O -0.4972505 -1.6675814 1.6237061  
Am 0.0428993 0.0408993 -0.0162005  
O 0.0994373 -1.8366459 -1.6041729  
C 1.0242498 -2.6596078 -1.8544697  
N 0.9213632 -3.6220998 -2.7850739  
C 1.9800736 -4.6234641 -3.0447346  
C 1.7954142 -5.9444949 -2.2781837  
C 2.8621071 -6.9908317 -2.6494317  
O -1.2959392 1.3525805 1.5555883  
C -1.3355785 2.5983274 1.7573726  
N -2.0689753 3.1578380 2.7324232  
C -2.1235882 4.6147024 2.9843467  
C -1.1701450 5.1020611 4.0884043  
C -1.3351603 6.6051863 4.3774712  
O 0.2619630 2.6706492 -0.0038151  
C 1.0127558 3.3798160 -0.9798001  
C 1.7592599 2.3389413 -1.8219557  
N 2.6350864 2.7644618 -2.7436207  
C 2.9531415 4.1925380 -2.9681451  
C 4.1900739 4.6904060 -2.2006527  
C 4.5390619 6.1505731 -2.5420426  
O 1.5164572 1.1149737 -1.6136437  
O -1.5954396 0.7695519 -1.6577084  
O 2.1492984 -1.5287755 -0.0881953  
C 3.2728508 -1.3444395 0.7629675  
C 2.9155361 -0.2205839 1.7435794

|   |            |            |            |
|---|------------|------------|------------|
| N | 3.7808700  | 0.0821074  | 2.7220955  |
| C | 5.0628650  | -0.6284506 | 2.9269778  |
| C | 5.0041943  | -1.7455105 | 3.9826258  |
| C | 6.3785113  | -2.4015194 | 4.2102420  |
| C | -0.5173013 | 3.5131099  | 0.8367270  |
| C | 2.3322170  | -2.5493770 | -1.0606746 |
| O | 1.8185628  | 0.3881487  | 1.5821047  |
| C | -3.0518787 | 1.9803646  | -3.6975336 |
| C | -2.5583469 | 1.5004299  | -5.0720438 |
| C | -2.1261664 | 2.6691626  | -5.9754135 |
| C | 3.4708641  | 1.1776445  | 3.6665152  |
| C | 4.1176711  | 2.5167911  | 3.2760748  |
| C | 3.8600301  | 3.6178630  | 4.3194730  |
| C | -0.3098298 | -3.7389425 | -3.5950611 |
| C | -0.1983663 | -3.0786109 | -4.9788816 |
| C | -1.4577498 | -3.3046200 | -5.8344347 |
| C | -2.8830249 | 2.2989869  | 3.6187236  |
| C | -4.3349617 | 2.1377411  | 3.1392972  |
| C | -5.1858034 | 1.3071495  | 4.1155439  |
| C | 3.3569828  | 1.7854811  | -3.5845418 |
| C | 2.7011476  | 1.5505361  | -4.9546637 |
| C | 3.5260256  | 0.5960244  | -5.8362956 |
| H | -4.1775984 | -2.3626072 | 3.8292232  |
| H | -0.3174874 | -5.5452196 | 3.2388904  |
| H | -5.8363293 | 1.2041191  | -1.2217197 |
| H | -3.3661700 | 0.9260355  | -5.5823021 |
| H | 5.2171865  | 2.3817442  | 3.1514166  |
| H | 4.2608293  | -2.5173390 | 3.6714900  |
| H | 1.8231856  | -5.7484815 | -1.1798637 |
| H | 0.6871820  | -3.4861496 | -5.5198299 |
| H | -4.8012781 | 3.1419225  | 3.0086123  |
| H | -0.1152645 | 4.8831634  | 3.7961677  |
| H | 4.0173831  | 4.5887404  | -1.1025425 |
| H | 2.5791334  | 2.5240897  | -5.4837932 |
| H | -2.9293792 | -3.0462686 | 0.2718591  |
| H | -3.6684500 | -1.8519532 | 1.4065318  |
| H | -2.6124145 | -5.0030635 | 3.3611811  |
| H | -3.4806518 | -4.1128278 | 2.1033356  |
| H | -3.2851279 | -3.2606126 | 5.0848603  |
| C | -6.0048023 | -3.7142191 | 5.4970550  |
| H | -4.7534057 | -5.2936671 | 4.6760935  |
| H | -5.6689744 | -4.3845990 | 3.4500838  |
| H | -1.0114220 | -3.6059510 | 4.7547081  |
| H | 0.0233969  | -2.5043229 | 3.7920892  |
| H | 0.7453066  | -4.4303777 | 2.3350132  |
| H | 0.9844779  | -5.0912502 | 5.3590548  |

|   |            |            |            |
|---|------------|------------|------------|
| H | 2.0485718  | -3.9722465 | 4.4765500  |
| C | 2.3351408  | -6.0738106 | 3.9657116  |
| H | -4.3047759 | -0.5211479 | -0.5875685 |
| H | -3.4740012 | -1.6965678 | -1.6764652 |
| H | -5.0494668 | -0.6249936 | -2.8203727 |
| H | -5.1254305 | 0.5181572  | -4.1666056 |
| H | -5.8701167 | 2.3633403  | -2.5758589 |
| H | -7.5986263 | 0.9455589  | -3.7633197 |
| C | -8.5072976 | 1.6750979  | -1.9243458 |
| H | -7.5708003 | -0.2281193 | -2.4257030 |
| H | -2.2354628 | 2.4871713  | -3.1459653 |
| H | -3.8823639 | 2.7093269  | -3.8197739 |
| H | -1.7089088 | 0.7931149  | -4.9271926 |
| C | -1.6509744 | 2.2160161  | -7.3616032 |
| H | -1.3158339 | 3.2458913  | -5.4689401 |
| H | -2.9785242 | 3.3787035  | -6.0909631 |
| H | 4.1724992  | -1.0626390 | 0.1621413  |
| H | 3.5079812  | -2.2904219 | 1.3059539  |
| H | 5.8069650  | 0.1392517  | 3.2295653  |
| H | 5.4246760  | -1.0254135 | 1.9555290  |
| H | 4.6299651  | -1.3255106 | 4.9444081  |
| C | 6.3517730  | -3.4973472 | 5.2828683  |
| H | 7.1133203  | -1.6151577 | 4.5003121  |
| H | 6.7504951  | -2.8258454 | 3.2478117  |
| H | 3.8286684  | 0.8539489  | 4.6671872  |
| H | 2.3676715  | 1.2731503  | 3.7177017  |
| H | 3.7250104  | 2.8329630  | 2.2813386  |
| H | 4.2486885  | 3.2825677  | 5.3087581  |
| H | 2.7596298  | 3.7482896  | 4.4542592  |
| C | 4.5020862  | 4.9607499  | 3.9492438  |
| H | 2.5796646  | -3.5167191 | -0.5627711 |
| H | 3.1799686  | -2.2886028 | -1.7400570 |
| H | 2.9737734  | -4.1776185 | -2.8282826 |
| H | 1.9736505  | -4.8172403 | -4.1385161 |
| H | 0.7823509  | -6.3566296 | -2.4934227 |
| H | 2.8304758  | -7.1680770 | -3.7495239 |
| C | 2.6790585  | -8.3222894 | -1.9103709 |
| H | 3.8763777  | -6.5780246 | -2.4361125 |
| H | -1.1361141 | -3.2840998 | -3.0126996 |
| H | -0.5284011 | -4.8234090 | -3.7017220 |
| H | -0.0155415 | -1.9868491 | -4.8478259 |
| C | -1.3661041 | -2.6600583 | -7.2230352 |
| H | -2.3483873 | -2.9071103 | -5.2916021 |
| H | -1.6337667 | -4.3998306 | -5.9453949 |
| H | -1.1985217 | 4.1479403  | 0.2185987  |
| H | 0.1423841  | 4.1920318  | 1.4260792  |

|   |            |            |            |
|---|------------|------------|------------|
| H | -3.1740124 | 4.8499417  | 3.2614993  |
| H | -1.9384975 | 5.1615322  | 2.0358842  |
| H | -1.3584613 | 4.5222047  | 5.0213219  |
| C | -0.4026724 | 7.1118199  | 5.4845245  |
| H | -2.3941642 | 6.8060937  | 4.6617983  |
| H | -1.1566360 | 7.1843409  | 3.4408722  |
| H | -2.8582730 | 2.7590040  | 4.6296156  |
| H | -2.3800226 | 1.3130921  | 3.6850501  |
| H | -4.3313063 | 1.6578074  | 2.1327487  |
| H | -5.1801670 | 1.7981297  | 5.1160364  |
| H | -4.7064084 | 0.3097700  | 4.2646902  |
| C | -6.6347248 | 1.1217264  | 3.6472601  |
| H | 1.7264774  | 4.0821882  | -0.4878511 |
| H | 0.3303822  | 3.9841495  | -1.6269670 |
| H | 2.0639099  | 4.8122194  | -2.7271119 |
| H | 3.1117988  | 4.3134767  | -4.0612879 |
| H | 5.0600345  | 4.0357440  | -2.4389935 |
| H | 4.7078111  | 6.2362477  | -3.6406245 |
| C | 5.7740396  | 6.6642446  | -1.7912712 |
| H | 3.6631908  | 6.8035221  | -2.3159512 |
| H | 3.4170206  | 0.8362051  | -3.0155106 |
| H | 4.3922465  | 2.1693528  | -3.7120632 |
| H | 1.6758943  | 1.1403613  | -4.8020451 |
| C | 2.8928187  | 0.3448046  | -7.2103170 |
| H | 3.6620873  | -0.3742646 | -5.3015106 |
| H | 4.5503490  | 1.0150524  | -5.9714229 |
| H | -6.8822329 | -4.3768824 | 5.6537165  |
| H | -5.4695355 | -3.6349990 | 6.4693627  |
| H | -6.3914617 | -2.7031064 | 5.2379313  |
| H | 3.1342795  | -6.2343971 | 4.7206847  |
| H | 1.7569950  | -7.0213926 | 3.8897362  |
| H | 2.8300881  | -5.9027657 | 2.9823048  |
| H | -9.5290120 | 1.3388303  | -2.2010216 |
| H | -8.4092723 | 1.5738428  | -0.8199712 |
| H | -8.4335111 | 2.7567609  | -2.1744701 |
| H | -1.3455268 | 3.0847783  | -7.9832402 |
| H | -0.7778432 | 1.5286758  | -7.2913298 |
| H | -2.4571746 | 1.6825660  | -7.9121861 |
| H | -7.2166575 | 0.5170712  | 4.3754669  |
| H | -7.1551621 | 2.0991339  | 3.5395853  |
| H | -6.6851045 | 0.6032948  | 2.6626474  |
| H | -0.5565639 | 8.1968241  | 5.6656409  |
| H | -0.5879559 | 6.5838133  | 6.4462335  |
| H | 0.6679772  | 6.9660370  | 5.2172834  |
| H | 5.9964426  | 7.7163354  | -2.0692551 |
| H | 5.6260336  | 6.6338043  | -0.6883911 |



|   |            |            |            |
|---|------------|------------|------------|
| H | 6.6762485  | 6.0586607  | -2.0302655 |
| H | 3.5175950  | -0.3440849 | -7.8181743 |
| H | 1.8807606  | -0.1103441 | -7.1180866 |
| H | 2.7863937  | 1.2903193  | -7.7866780 |
| H | -2.2889254 | -2.8469544 | -7.8127302 |
| H | -1.2272835 | -1.5575989 | -7.1539718 |
| H | -0.5123019 | -3.0715947 | -7.8056508 |
| H | 3.4640282  | -9.0504836 | -2.2058298 |
| H | 2.7428236  | -8.1907355 | -0.8069572 |
| H | 1.6930893  | -8.7838833 | -2.1414338 |
| H | 7.3599262  | -3.9435653 | 5.4178919  |
| H | 6.0313966  | -3.0936297 | 6.2688672  |
| H | 5.6549248  | -4.3212640 | 5.0098307  |
| H | 4.2983876  | 5.7293321  | 4.7252909  |
| H | 5.6069746  | 4.8705356  | 3.8553463  |
| H | 4.1129365  | 5.3485581  | 2.9805454  |

Cm(TBDGA)33+

|    |            |            |            |
|----|------------|------------|------------|
| C  | -5.1129830 | -4.3027079 | 4.3305941  |
| C  | -3.8842606 | -3.4195859 | 4.0482215  |
| C  | -2.9409446 | -4.0516377 | 3.0106497  |
| N  | -1.6998438 | -3.2836381 | 2.7679368  |
| C  | -1.5571141 | -2.4049925 | 1.7645735  |
| C  | -2.7321851 | -2.1909317 | 0.8019934  |
| O  | -2.3822874 | -1.1067616 | -0.0477465 |
| C  | -3.3546367 | -0.8246789 | -1.0433528 |
| C  | -2.8340114 | 0.3609122  | -1.8648066 |
| N  | -3.6336282 | 0.8847101  | -2.8063239 |
| C  | -5.0189402 | 0.4213824  | -3.0449844 |
| C  | -6.0874793 | 1.2260099  | -2.2848348 |
| C  | -7.5169241 | 0.7528501  | -2.6071282 |
| C  | -0.5798675 | -3.5186077 | 3.7040299  |
| C  | 0.2662648  | -4.7518703 | 3.3459649  |
| C  | 1.3873475  | -5.0071906 | 4.3680452  |
| O  | -0.4941954 | -1.7515116 | 1.5669767  |
| Cm | -0.0078860 | 0.0104770  | -0.0310200 |
| O  | 0.1199432  | -1.8130844 | -1.6397626 |
| C  | 1.0598865  | -2.6240648 | -1.8771935 |
| N  | 0.9828719  | -3.5831012 | -2.8122698 |
| C  | 2.0580285  | -4.5704022 | -3.0591284 |
| C  | 1.8779337  | -5.8959766 | -2.2994000 |
| C  | 2.9628357  | -6.9280574 | -2.6575876 |
| O  | -1.2963679 | 1.3261613  | 1.5497665  |
| C  | -1.3134122 | 2.5730167  | 1.7537153  |
| N  | -2.0270694 | 3.1446668  | 2.7355266  |

|   |            |            |            |
|---|------------|------------|------------|
| C | -2.0370347 | 4.6012245  | 2.9976902  |
| C | -1.0520177 | 5.0527777  | 4.0892118  |
| C | -1.1729330 | 6.5567335  | 4.3955240  |
| O | 0.2486687  | 2.6215249  | -0.0397856 |
| C | 1.0278733  | 3.3193303  | -1.0007272 |
| C | 1.7681130  | 2.2670584  | -1.8355772 |
| N | 2.6468227  | 2.6839735  | -2.7594787 |
| C | 2.9845073  | 4.1077941  | -2.9804167 |
| C | 4.2235660  | 4.5856369  | -2.2036117 |
| C | 4.5948915  | 6.0428462  | -2.5332736 |
| O | 1.5173748  | 1.0468079  | -1.6225694 |
| O | -1.6700596 | 0.7923894  | -1.6278124 |
| O | 2.1324445  | -1.5046496 | -0.0720205 |
| C | 3.2544196  | -1.2815305 | 0.7714337  |
| C | 2.8785413  | -0.1466387 | 1.7336610  |
| N | 3.7363001  | 0.1728256  | 2.7150228  |
| C | 5.0222323  | -0.5251197 | 2.9362967  |
| C | 4.9668071  | -1.6356281 | 3.9989803  |
| C | 6.3485950  | -2.2673846 | 4.2490890  |
| C | -0.4924932 | 3.4746458  | 0.8224978  |
| C | 2.3519923  | -2.5007575 | -1.0605947 |
| O | 1.7801609  | 0.4513466  | 1.5566258  |
| C | -3.1534169 | 2.0008163  | -3.6487441 |
| C | -2.6307758 | 1.5482373  | -5.0217893 |
| C | -2.2077513 | 2.7359820  | -5.9041532 |
| C | 3.4117556  | 1.2746731  | 3.6464052  |
| C | 4.0650474  | 2.6115118  | 3.2589195  |
| C | 3.7818727  | 3.7210245  | 4.2864843  |
| C | -0.2339652 | -3.7110864 | -3.6424006 |
| C | -0.1113533 | -3.0374204 | -5.0188633 |
| C | -1.3580687 | -3.2682961 | -5.8915440 |
| C | -2.8588328 | 2.3060459  | 3.6255563  |
| C | -4.3342208 | 2.2490413  | 3.1955256  |
| C | -5.2009517 | 1.4362396  | 4.1731200  |
| C | 3.3522522  | 1.6972108  | -3.6045094 |
| C | 2.6889738  | 1.4791853  | -4.9739961 |
| C | 3.4876897  | 0.5055186  | -5.8585107 |
| H | -4.2125815 | -2.4133391 | 3.6937157  |
| H | -0.3866203 | -5.6535227 | 3.2861788  |
| H | -5.9035252 | 1.1501765  | -1.1863788 |
| H | -3.4196249 | 0.9641736  | -5.5504634 |
| H | 5.1673467  | 2.4778958  | 3.1604531  |
| H | 4.2398864  | -2.4216763 | 3.6838456  |
| H | 1.8870201  | -5.7030240 | -1.2002086 |
| H | 0.7850546  | -3.4313345 | -5.5520078 |
| H | -4.7442997 | 3.2828111  | 3.1181527  |

|   |            |            |            |
|---|------------|------------|------------|
| H | -0.0082672 | 4.8096521  | 3.7769290  |
| H | 4.0426642  | 4.4798901  | -1.1071549 |
| H | 2.5895606  | 2.4559022  | -5.5019003 |
| H | -2.9078920 | -3.1152231 | 0.1976331  |
| H | -3.6719819 | -1.9611305 | 1.3569913  |
| H | -2.6274701 | -5.0613837 | 3.3526890  |
| H | -3.4678042 | -4.2160007 | 2.0471893  |
| H | -3.3261527 | -3.2460975 | 4.9971878  |
| C | -6.0633167 | -3.6970719 | 5.3708024  |
| H | -4.7683725 | -5.3036983 | 4.6796267  |
| H | -5.6645770 | -4.4852670 | 3.3781646  |
| H | -1.0215585 | -3.6346608 | 4.7174782  |
| H | 0.0448326  | -2.6028013 | 3.7129080  |
| H | 0.7020137  | -4.6111668 | 2.3289292  |
| H | 0.9392122  | -5.1234459 | 5.3820141  |
| H | 2.0422637  | -4.1050969 | 4.4279949  |
| C | 2.2335244  | -6.2441542 | 4.0403020  |
| H | -4.3350360 | -0.5836996 | -0.5690045 |
| H | -3.5030647 | -1.7147905 | -1.7027583 |
| H | -5.0948075 | -0.6597748 | -2.8036701 |
| H | -5.1958076 | 0.4943709  | -4.1392689 |
| H | -5.9867744 | 2.3058699  | -2.5410940 |
| H | -7.6851861 | 0.8243725  | -3.7067124 |
| C | -8.5947606 | 1.5573490  | -1.8696358 |
| H | -7.6152456 | -0.3291128 | -2.3531050 |
| H | -2.3583154 | 2.5259107  | -3.0832723 |
| H | -4.0037053 | 2.7060909  | -3.7724656 |
| H | -1.7695219 | 0.8561396  | -4.8727995 |
| C | -1.7016301 | 2.3085912  | -7.2876177 |
| H | -1.4169673 | 3.3218646  | -5.3777279 |
| H | -3.0715944 | 3.4305560  | -6.0248343 |
| H | 4.1446845  | -0.9905932 | 0.1608604  |
| H | 3.5123671  | -2.2125994 | 1.3291650  |
| H | 5.7566246  | 0.2512413  | 3.2405221  |
| H | 5.3972231  | -0.9241758 | 1.9706969  |
| H | 4.5732624  | -1.2150277 | 4.9527609  |
| C | 6.3244909  | -3.3648579 | 5.3200453  |
| H | 7.0640725  | -1.4679846 | 4.5518924  |
| H | 6.7442690  | -2.6837540 | 3.2926362  |
| H | 3.7525646  | 0.9581074  | 4.6553924  |
| H | 2.3079702  | 1.3705587  | 3.6789747  |
| H | 3.6951555  | 2.9185613  | 2.2525852  |
| H | 4.1380230  | 3.3902616  | 5.2895413  |
| H | 2.6783776  | 3.8577890  | 4.3863482  |
| C | 4.4421018  | 5.0582680  | 3.9282512  |
| H | 2.6156207  | -3.4722560 | -0.5796709 |

|   |            |            |            |
|---|------------|------------|------------|
| H | 3.2019431  | -2.2067115 | -1.7240944 |
| H | 3.0425308  | -4.1125586 | -2.8264957 |
| H | 2.0698107  | -4.7601887 | -4.1534830 |
| H | 0.8732806  | -6.3196939 | -2.5309895 |
| H | 2.9471991  | -7.1052226 | -3.7580038 |
| C | 2.7881084  | -8.2620319 | -1.9210036 |
| H | 3.9688113  | -6.5020444 | -2.4313926 |
| H | -1.0758563 | -3.2736236 | -3.0691372 |
| H | -0.4341429 | -4.7977989 | -3.7611582 |
| H | 0.0584809  | -1.9450724 | -4.8758634 |
| C | -1.2560217 | -2.6121916 | -7.2740124 |
| H | -2.2584934 | -2.8827934 | -5.3563247 |
| H | -1.5227854 | -4.3641779 | -6.0129367 |
| H | -1.1710317 | 4.1313121  | 0.2246190  |
| H | 0.1955584  | 4.1319643  | 1.4041769  |
| H | -3.0750452 | 4.8636532  | 3.2948951  |
| H | -1.8533058 | 5.1498195  | 2.0500925  |
| H | -1.2393952 | 4.4689962  | 5.0198655  |
| C | -0.2095817 | 7.0274943  | 5.4919386  |
| H | -2.2214296 | 6.7820005  | 4.6996593  |
| H | -0.9949315 | 7.1407687  | 3.4618648  |
| H | -2.7708419 | 2.7297053  | 4.6490509  |
| H | -2.4130515 | 1.2912532  | 3.6419322  |
| H | -4.3968255 | 1.8091748  | 2.1725104  |
| H | -5.1117066 | 1.8748934  | 5.1939716  |
| H | -4.7944360 | 0.3995698  | 4.2517635  |
| C | -6.6798429 | 1.3869193  | 3.7683016  |
| H | 1.7473954  | 4.0047848  | -0.4935712 |
| H | 0.3682891  | 3.9397612  | -1.6557476 |
| H | 2.1027993  | 4.7394308  | -2.7425941 |
| H | 3.1510224  | 4.2294103  | -4.0722528 |
| H | 5.0859523  | 3.9203722  | -2.4403179 |
| H | 4.7772147  | 6.1325046  | -3.6293337 |
| C | 5.8277404  | 6.5357145  | -1.7652661 |
| H | 3.7250787  | 6.7059520  | -2.3132697 |
| H | 3.3962567  | 0.7447180  | -3.0394460 |
| H | 4.3938477  | 2.0635403  | -3.7325185 |
| H | 1.6543031  | 1.0939262  | -4.8198378 |
| C | 2.8465099  | 0.2750856  | -7.2325234 |
| H | 3.5978310  | -0.4693844 | -5.3262533 |
| H | 4.5228652  | 0.8970178  | -5.9935286 |
| H | -6.9326610 | -4.3649918 | 5.5488067  |
| H | -5.5542060 | -3.5457617 | 6.3486349  |
| H | -6.4609604 | -2.7122627 | 5.0377675  |
| H | 3.0336069  | -6.3928887 | 4.7967243  |
| H | 1.6143587  | -7.1685319 | 4.0285168  |

|   |            |            |            |
|---|------------|------------|------------|
| H | 2.7232853  | -6.1553353 | 3.0438687  |
| H | -9.6101831 | 1.1883713  | -2.1271507 |
| H | -8.4804249 | 1.4796534  | -0.7649074 |
| H | -8.5535995 | 2.6356674  | -2.1403850 |
| H | -1.4015815 | 3.1902498  | -7.8935262 |
| H | -0.8175001 | 1.6360263  | -7.2110568 |
| H | -2.4887484 | 1.7675024  | -7.8579676 |
| H | -7.2740690 | 0.7920953  | 4.4945491  |
| H | -7.1254066 | 2.4057989  | 3.7329964  |
| H | -6.8160897 | 0.9258097  | 2.7635987  |
| H | -0.3342397 | 8.1135295  | 5.6887015  |
| H | -0.3907621 | 6.4921135  | 6.4503529  |
| H | 0.8524580  | 6.8596743  | 5.2041340  |
| H | 6.0667728  | 7.5868261  | -2.0329397 |
| H | 5.6666631  | 6.4991629  | -0.6643449 |
| H | 6.7248890  | 5.9203498  | -1.9983034 |
| H | 3.4495854  | -0.4318398 | -7.8415715 |
| H | 1.8210401  | -0.1489761 | -7.1402441 |
| H | 2.7686917  | 1.2240553  | -7.8076773 |
| H | -2.1724642 | -2.7986323 | -7.8736896 |
| H | -1.1229802 | -1.5097585 | -7.1946184 |
| H | -0.3949111 | -3.0151210 | -7.8518395 |
| H | 3.5850071  | -8.9803585 | -2.2084966 |
| H | 2.8387595  | -8.1302224 | -0.8169412 |
| H | 1.8103455  | -8.7355937 | -2.1625078 |
| H | 7.3390077  | -3.7900484 | 5.4738760  |
| H | 5.9768398  | -2.9693903 | 6.3001274  |
| H | 5.6505991  | -4.2029767 | 5.0329571  |
| H | 4.2152726  | 5.8337133  | 4.6909910  |
| H | 5.5491266  | 4.9625582  | 3.8732659  |
| H | 4.0885463  | 5.4403254  | 2.9437856  |

Am(TiBDGA)33+

|   |            |            |            |
|---|------------|------------|------------|
| C | -5.4374153 | -4.1518796 | 3.9399317  |
| C | -4.1492209 | -3.3110334 | 3.8700965  |
| C | -3.1357253 | -4.0440202 | 2.9564690  |
| N | -1.8432973 | -3.3539475 | 2.7320335  |
| C | -1.6672412 | -2.4399705 | 1.7633310  |
| C | -2.8226758 | -2.1723811 | 0.7917860  |
| O | -2.4272722 | -1.0995030 | -0.0489693 |
| C | -3.3686785 | -0.8030912 | -1.0691137 |
| C | -2.8186227 | 0.3906450  | -1.8564811 |
| N | -3.5977265 | 0.9807401  | -2.7780945 |
| C | -4.9830368 | 0.5534465  | -3.0869301 |
| C | -6.1023689 | 1.4670299  | -2.5318403 |

|    |            |            |            |
|----|------------|------------|------------|
| C  | -7.4544079 | 0.9930681  | -3.0967145 |
| C  | -0.7067194 | -3.6988696 | 3.6153967  |
| C  | 0.2487924  | -4.7786591 | 3.0535462  |
| C  | 1.3547996  | -5.0381372 | 4.0919090  |
| O  | -0.5817580 | -1.8137750 | 1.5964672  |
| Am | -0.0072669 | -0.0660369 | 0.0065341  |
| O  | -0.0015671 | -1.9677753 | -1.5612187 |
| C  | 0.9207253  | -2.7917589 | -1.8197820 |
| N  | 0.7744314  | -3.8076853 | -2.6874356 |
| C  | 1.8495146  | -4.7934070 | -2.9551906 |
| C  | 1.9121556  | -6.0133707 | -2.0023226 |
| C  | 3.1403008  | -6.8626340 | -2.3800755 |
| O  | -1.2932483 | 1.2530526  | 1.6229384  |
| C  | -1.2864862 | 2.4946896  | 1.8530865  |
| N  | -1.9849521 | 3.0586530  | 2.8531624  |
| C  | -1.9400034 | 4.5115374  | 3.1435293  |
| C  | -0.8011198 | 4.9864807  | 4.0794443  |
| C  | -0.8793436 | 6.5195453  | 4.2011250  |
| O  | 0.2847053  | 2.5575888  | 0.0663683  |
| C  | 1.0481316  | 3.2662215  | -0.8998244 |
| C  | 1.7906398  | 2.2244320  | -1.7428284 |
| N  | 2.7110414  | 2.6400133  | -2.6278547 |
| C  | 3.0778789  | 4.0676066  | -2.7899802 |
| C  | 4.1861524  | 4.6023442  | -1.8490972 |
| C  | 4.3580387  | 6.1106640  | -2.1087124 |
| O  | 1.4995472  | 1.0044887  | -1.5761445 |
| O  | -1.6403885 | 0.7794049  | -1.6076860 |
| O  | 2.1129702  | -1.5945469 | -0.1431297 |
| C  | 3.2945828  | -1.3432636 | 0.6080944  |
| C  | 2.9560234  | -0.2470059 | 1.6257558  |
| N  | 3.8902771  | 0.1470171  | 2.5058757  |
| C  | 5.2514564  | -0.4325697 | 2.5860789  |
| C  | 5.5042691  | -1.3710509 | 3.7902910  |
| C  | 6.9975109  | -1.7438831 | 3.8232249  |
| C  | -0.4646417 | 3.4034112  | 0.9300628  |
| C  | 2.2746991  | -2.6105083 | -1.1245105 |
| O  | 1.7994892  | 0.2636679  | 1.5880442  |
| C  | -3.0722613 | 2.1452878  | -3.5257416 |
| C  | -2.1751180 | 1.8181117  | -4.7416815 |
| C  | -1.7072121 | 3.1461030  | -5.3650242 |
| C  | 3.5533417  | 1.2166770  | 3.4727772  |
| C  | 3.6473793  | 2.6605383  | 2.9248608  |
| C  | 3.2817833  | 3.6351264  | 4.0589040  |
| C  | -0.5101237 | -3.9534664 | -3.4082385 |
| C  | -0.6552448 | -3.0810880 | -4.6771203 |
| C  | -2.0657741 | -3.2951261 | -5.2547911 |

|   |            |            |            |
|---|------------|------------|------------|
| C | -2.8397271 | 2.1988574  | 3.7028707  |
| C | -4.2469949 | 1.9101423  | 3.1283976  |
| C | -4.9970070 | 0.9924392  | 4.1101780  |
| C | 3.3933522  | 1.6347094  | -3.4747260 |
| C | 2.6313321  | 1.2257384  | -4.7567893 |
| C | 3.4176199  | 0.0999581  | -5.4524400 |
| H | -4.4011114 | -2.3346267 | 3.3881855  |
| H | 2.0651530  | -5.6302702 | -0.9636482 |
| H | 0.1713740  | 4.7283985  | 3.5934785  |
| H | 3.8355116  | 4.4721501  | -0.7958679 |
| H | -3.0215356 | -3.0892161 | 0.1827597  |
| H | -3.7614520 | -1.9148330 | 1.3353570  |
| H | -2.8944631 | -5.0324484 | 3.3987018  |
| H | -3.6043075 | -4.2634354 | 1.9730278  |
| H | -5.2474186 | -5.1389898 | 4.4188238  |
| H | -5.8702271 | -4.3418531 | 2.9324665  |
| H | -1.1385835 | -4.0431625 | 4.5769952  |
| H | -0.1404794 | -2.7652513 | 3.8138413  |
| H | 0.7202703  | -4.3492362 | 2.1377832  |
| H | 0.9346478  | -5.4805678 | 5.0229441  |
| H | 1.8883765  | -4.1035457 | 4.3738967  |
| H | -4.3577975 | -0.5622430 | -0.6178736 |
| H | -3.5014187 | -1.6837168 | -1.7451459 |
| H | -5.1329740 | -0.4894699 | -2.7370269 |
| H | -5.0616303 | 0.5171218  | -4.1933961 |
| H | -5.9181445 | 2.4964011  | -2.9192035 |
| H | -7.4635996 | 1.0016376  | -4.2086212 |
| H | -7.6959574 | -0.0408299 | -2.7603389 |
| H | -2.5055363 | 2.7729660  | -2.8068815 |
| H | -3.9530985 | 2.7339162  | -3.8592506 |
| H | -1.2805766 | 1.2776706  | -4.3540513 |
| H | -1.1759696 | 3.7884188  | -4.6266864 |
| H | -2.5661055 | 3.7316671  | -5.7643213 |
| H | 4.1189086  | -1.0080229 | -0.0680499 |
| H | 3.6297110  | -2.2741384 | 1.1215586  |
| H | 5.9588260  | 0.4219817  | 2.6357879  |
| H | 5.4795396  | -0.9658053 | 1.6391119  |
| H | 5.2802829  | -0.7956011 | 4.7187687  |
| H | 7.6475157  | -0.8438808 | 3.8880822  |
| H | 7.2942204  | -2.3162673 | 2.9148247  |
| H | 4.2433585  | 1.0982078  | 4.3343862  |
| H | 2.5232403  | 1.0252945  | 3.8393729  |
| H | 2.8780591  | 2.7527803  | 2.1215948  |
| H | 4.0261725  | 3.5887173  | 4.8859747  |
| H | 2.2829075  | 3.4098684  | 4.4945941  |
| H | 2.6147189  | -3.5560946 | -0.6432547 |

|   |            |            |            |
|---|------------|------------|------------|
| H | 3.0501128  | -2.3096963 | -1.8716315 |
| H | 2.8273414  | -4.2657169 | -2.9570994 |
| H | 1.7006891  | -5.1494793 | -3.9956634 |
| H | 3.0426772  | -7.2751375 | -3.4095680 |
| H | 4.0852617  | -6.2762627 | -2.3379250 |
| H | -1.3212391 | -3.7059241 | -2.6924945 |
| H | -0.6115133 | -5.0254511 | -3.6749984 |
| H | -0.5664190 | -2.0163479 | -4.3570946 |
| H | -2.8603309 | -3.0577200 | -4.5114617 |
| H | -2.2151351 | -4.3492346 | -5.5813827 |
| H | -1.1475463 | 4.0567768  | 0.3328450  |
| H | 0.2181330  | 4.0638579  | 1.5122807  |
| H | -2.9179973 | 4.7743562  | 3.5965176  |
| H | -1.8958337 | 5.0692939  | 2.1835390  |
| H | -1.8313966 | 6.8360598  | 4.6834820  |
| H | -0.8177953 | 7.0235028  | 3.2110369  |
| H | -2.9310117 | 2.7046093  | 4.6857683  |
| H | -2.2982804 | 1.2432863  | 3.8627663  |
| H | -4.1006594 | 1.3547033  | 2.1712869  |
| H | -5.1743215 | 1.5037293  | 5.0833009  |
| H | -4.4305363 | 0.0575043  | 4.3207665  |
| H | 1.7598807  | 3.9612326  | -0.3974214 |
| H | 0.3767719  | 3.8777147  | -1.5525998 |
| H | 2.1609315  | 4.6859156  | -2.6828215 |
| H | 3.4018429  | 4.1925136  | -3.8436843 |
| H | 4.7142162  | 6.3017537  | -3.1458260 |
| H | 3.4076762  | 6.6719141  | -1.9684229 |
| H | 3.5686813  | 0.7375605  | -2.8449416 |
| H | 4.3829793  | 2.0568355  | -3.7446825 |
| H | 1.6442524  | 0.8166685  | -4.4368989 |
| H | 3.5659414  | -0.7773439 | -4.7831589 |
| H | 4.4225311  | 0.4498127  | -5.7797777 |
| H | -0.0475835 | 6.9055676  | 4.8282348  |
| H | -5.9912808 | 0.7067625  | 3.7040440  |
| H | 5.1105522  | 6.5442161  | -1.4160313 |
| H | 2.8818799  | -0.2535960 | -6.3594825 |
| H | -1.0136719 | 2.9608882  | -6.2128564 |
| H | -8.2759137 | 1.6564350  | -2.7517554 |
| H | -6.2108685 | -3.6340503 | 4.5462658  |
| H | 2.1073448  | -5.7551414 | 3.6982984  |
| H | 3.2678923  | 4.6838772  | 3.6909639  |
| H | 7.2209238  | -2.3805270 | 4.7054959  |
| H | 3.2482062  | -7.7244824 | -1.6876132 |
| H | -2.2296870 | -2.6502291 | -6.1446621 |
| C | 5.5224257  | 3.8549529  | -1.9921814 |
| H | 5.4365500  | 2.7764188  | -1.7329652 |



|   |            |            |            |
|---|------------|------------|------------|
| H | 5.9243021  | 3.9346551  | -3.0278986 |
| H | 6.2845916  | 4.2962196  | -1.3141040 |
| C | 2.3836870  | 2.4031946  | -5.7146808 |
| H | 3.3397659  | 2.8688470  | -6.0457282 |
| H | 1.8600515  | 2.0544240  | -6.6312042 |
| H | 1.7491447  | 3.1955602  | -5.2591132 |
| C | 0.4260592  | -3.3612410 | -5.7337968 |
| H | 0.3956830  | -4.4199060 | -6.0788143 |
| H | 0.2682766  | -2.7240035 | -6.6308875 |
| H | 1.4512116  | -3.1466828 | -5.3588836 |
| C | 0.6262120  | -6.8560810 | -2.0044350 |
| H | 0.4106160  | -7.2649334 | -3.0176841 |
| H | 0.7339660  | -7.7254653 | -1.3204390 |
| H | -0.2618687 | -6.2786529 | -1.6649370 |
| C | 4.6051501  | -2.6156995 | 3.7765894  |
| H | 3.5239789  | -2.3516770 | 3.7405098  |
| H | 4.8412923  | -3.2762853 | 2.9099179  |
| H | 4.7627287  | -3.2214070 | 4.6946057  |
| C | 5.0194493  | 3.0013077  | 2.3207369  |
| H | 5.0352330  | 4.0531357  | 1.9601261  |
| H | 5.8337994  | 2.9071040  | 3.0745692  |
| H | 5.2735848  | 2.3528918  | 1.4527246  |
| C | -0.8240942 | 4.3123553  | 5.4615212  |
| H | -1.7752978 | 4.5223963  | 6.0015449  |
| H | -0.6939095 | 3.2094793  | 5.3991953  |
| H | 0.0007509  | 4.7057160  | 6.0943536  |
| C | -5.0596585 | 3.1803774  | 2.8289172  |
| H | -6.0647639 | 2.9150010  | 2.4349107  |
| H | -5.2234943 | 3.7872565  | 3.7484446  |
| H | -4.5716907 | 3.8288482  | 2.0674319  |
| C | -0.4578733 | -6.0871840 | 2.6618869  |
| H | 0.2790654  | -6.8241931 | 2.2749021  |
| H | -0.9566709 | -6.5613645 | 3.5374476  |
| H | -1.2210951 | -5.9377270 | 1.8664850  |
| C | -3.5992371 | -3.0086709 | 5.2735465  |
| H | -3.3193657 | -3.9431641 | 5.8111014  |
| H | -2.7095337 | -2.3412057 | 5.2474100  |
| H | -4.3735943 | -2.5010908 | 5.8884256  |
| C | -6.1232704 | 1.5372277  | -0.9972206 |
| H | -6.3965297 | 0.5522618  | -0.5508285 |
| H | -5.1450857 | 1.8627625  | -0.5744723 |
| H | -6.8862523 | 2.2680180  | -0.6525732 |
| C | -2.8630454 | 0.9276822  | -5.7896501 |
| H | -3.7817198 | 1.4081551  | -6.1960971 |
| H | -2.1833547 | 0.7492531  | -6.6511676 |
| H | -3.1414199 | -0.0697496 | -5.3828899 |

Cm(TiBDGA)33+

|    |            |            |            |
|----|------------|------------|------------|
| C  | -5.4341146 | -4.1870600 | 3.9380298  |
| C  | -4.1313271 | -3.3692022 | 3.8642442  |
| C  | -3.1460142 | -4.1028261 | 2.9208424  |
| N  | -1.8461551 | -3.4302732 | 2.6858389  |
| C  | -1.6717848 | -2.5014894 | 1.7315826  |
| C  | -2.8394881 | -2.1949621 | 0.7862663  |
| O  | -2.4402642 | -1.1107115 | -0.0413867 |
| C  | -3.4053692 | -0.7723320 | -1.0282119 |
| C  | -2.8607347 | 0.4339658  | -1.8008762 |
| N  | -3.6417847 | 1.0281416  | -2.7179106 |
| C  | -5.0249222 | 0.5978102  | -3.0317016 |
| C  | -6.1482796 | 1.5029998  | -2.4711309 |
| C  | -7.4976210 | 1.0278290  | -3.0414069 |
| C  | -0.6995122 | -3.8075419 | 3.5431249  |
| C  | 0.2323635  | -4.8868550 | 2.9426576  |
| C  | 1.3622465  | -5.1708672 | 3.9484209  |
| O  | -0.5806310 | -1.8881117 | 1.5567460  |
| Cm | -0.0371467 | -0.0845814 | 0.0188655  |
| O  | 0.0332359  | -1.9220031 | -1.5873423 |
| C  | 0.9543016  | -2.7564209 | -1.8195325 |
| N  | 0.8285578  | -3.7569885 | -2.7067394 |
| C  | 1.9000379  | -4.7538365 | -2.9474554 |
| C  | 1.9112498  | -5.9888033 | -2.0117894 |
| C  | 3.1312296  | -6.8576944 | -2.3711641 |
| O  | -1.2630181 | 1.2348400  | 1.6469152  |
| C  | -1.2645904 | 2.4821142  | 1.8504162  |
| N  | -1.9465288 | 3.0574515  | 2.8541282  |
| C  | -1.9194604 | 4.5178952  | 3.1090693  |
| C  | -0.7680471 | 5.0335241  | 4.0069894  |
| C  | -0.8691607 | 6.5676181  | 4.0938233  |
| O  | 0.2727120  | 2.5223645  | 0.0347246  |
| C  | 1.0343653  | 3.2152648  | -0.9435419 |
| C  | 1.7950741  | 2.1613825  | -1.7568302 |
| N  | 2.7061765  | 2.5715638  | -2.6549645 |
| C  | 3.0494310  | 4.0000871  | -2.8532998 |
| C  | 4.1543718  | 4.5737574  | -1.9315325 |
| C  | 4.3031848  | 6.0774650  | -2.2291703 |
| O  | 1.5265246  | 0.9424440  | -1.5578606 |
| O  | -1.6863137 | 0.8274805  | -1.5442491 |
| O  | 2.0906346  | -1.6064345 | -0.0717073 |
| C  | 3.2561753  | -1.3555414 | 0.7036614  |
| C  | 2.9194020  | -0.2122132 | 1.6702397  |
| N  | 3.8465080  | 0.1948983  | 2.5530645  |

|   |            |            |            |
|---|------------|------------|------------|
| C | 5.1871643  | -0.4190839 | 2.6920651  |
| C | 5.3869455  | -1.3001960 | 3.9486716  |
| C | 6.8618279  | -1.7351521 | 4.0192773  |
| C | -0.4754712 | 3.3784814  | 0.8879354  |
| C | 2.2790796  | -2.6059462 | -1.0637586 |
| O | 1.7772926  | 0.3217089  | 1.5895997  |
| C | -3.1186820 | 2.2003119  | -3.4553747 |
| C | -2.2144880 | 1.8834377  | -4.6688551 |
| C | -1.7376102 | 3.2159754  | -5.2754112 |
| C | 3.5207257  | 1.3150984  | 3.4643498  |
| C | 3.6630950  | 2.7294603  | 2.8534152  |
| C | 3.3141016  | 3.7648521  | 3.9379014  |
| C | -0.4295696 | -3.8786547 | -3.4779299 |
| C | -0.5124980 | -3.0047299 | -4.7516793 |
| C | -1.9026128 | -3.2013214 | -5.3830580 |
| C | -2.7642928 | 2.2034037  | 3.7457412  |
| C | -4.1823895 | 1.8794021  | 3.2188554  |
| C | -4.8842198 | 0.9650662  | 4.2388215  |
| C | 3.4020874  | 1.5581267  | -3.4800888 |
| C | 2.6392837  | 1.1018931  | -4.7458107 |
| C | 3.4459147  | -0.0213046 | -5.4220355 |
| H | -4.3721062 | -2.3788040 | 3.4056179  |
| H | 2.0450758  | -5.6251736 | -0.9636220 |
| H | 0.1972057  | 4.7800772  | 3.5045717  |
| H | 3.8105468  | 4.4643552  | -0.8736650 |
| H | -3.0660469 | -3.0942641 | 0.1615950  |
| H | -3.7634872 | -1.9306334 | 1.3511300  |
| H | -2.9139018 | -5.1027936 | 3.3415429  |
| H | -3.6345795 | -4.2969389 | 1.9416994  |
| H | -5.2559967 | -5.1860827 | 4.3962799  |
| H | -5.8849831 | -4.3504579 | 2.9338193  |
| H | -1.1197884 | -4.1663037 | 4.5044649  |
| H | -0.1186987 | -2.8851245 | 3.7512871  |
| H | 0.6846990  | -4.4484050 | 2.0215497  |
| H | 0.9616774  | -5.6179355 | 4.8858719  |
| H | 1.9155790  | -4.2461796 | 4.2249845  |
| H | -4.3777913 | -0.5277587 | -0.5430916 |
| H | -3.5705209 | -1.6348289 | -1.7191425 |
| H | -5.1718156 | -0.4475304 | -2.6876996 |
| H | -5.1023553 | 0.5682983  | -4.1384601 |
| H | -5.9676437 | 2.5360120  | -2.8503243 |
| H | -7.5042861 | 1.0419648  | -4.1532753 |
| H | -7.7368189 | -0.0084574 | -2.7107402 |
| H | -2.5575684 | 2.8252787  | -2.7297628 |
| H | -4.0003196 | 2.7875788  | -3.7889677 |
| H | -1.3242184 | 1.3362345  | -4.2809624 |

|   |            |            |            |
|---|------------|------------|------------|
| H | -1.2081083 | 3.8481856  | -4.5270476 |
| H | -2.5915007 | 3.8096028  | -5.6734366 |
| H | 4.1053432  | -1.0648592 | 0.0380496  |
| H | 3.5549108  | -2.2739895 | 1.2604954  |
| H | 5.9205347  | 0.4148244  | 2.7120780  |
| H | 5.4172662  | -1.0088445 | 1.7799703  |
| H | 5.1803776  | -0.6657246 | 4.8417421  |
| H | 7.5501125  | -0.8617111 | 4.0399933  |
| H | 7.1407465  | -2.3709312 | 3.1482445  |
| H | 4.1922319  | 1.2188670  | 4.3429694  |
| H | 2.4797914  | 1.1678356  | 3.8206866  |
| H | 2.9060464  | 2.8071169  | 2.0370748  |
| H | 4.0518355  | 3.7387762  | 4.7717327  |
| H | 2.3072679  | 3.5842109  | 4.3762429  |
| H | 2.5872462  | -3.5657979 | -0.5892300 |
| H | 3.0879154  | -2.3011884 | -1.7731255 |
| H | 2.8839519  | -4.2393862 | -2.9053667 |
| H | 1.7851748  | -5.0927119 | -3.9976400 |
| H | 3.0489752  | -7.2566076 | -3.4072923 |
| H | 4.0859895  | -6.2903429 | -2.3009190 |
| H | -1.2627489 | -3.6165476 | -2.7938946 |
| H | -0.5393064 | -4.9486521 | -3.7490464 |
| H | -0.4222070 | -1.9408096 | -4.4289913 |
| H | -2.7220735 | -2.9543615 | -4.6709713 |
| H | -2.0513617 | -4.2535514 | -5.7158385 |
| H | -1.1804342 | 4.0048269  | 0.2871154  |
| H | 0.2064264  | 4.0649992  | 1.4401961  |
| H | -2.8915387 | 4.7751888  | 3.5778895  |
| H | -1.9059367 | 5.0526156  | 2.1352463  |
| H | -1.8150182 | 6.8808028  | 4.5904371  |
| H | -0.8379839 | 7.0483517  | 3.0907806  |
| H | -2.8360366 | 2.7292791  | 4.7195419  |
| H | -2.2028902 | 1.2603120  | 3.9106494  |
| H | -4.0548398 | 1.3102301  | 2.2672284  |
| H | -5.0397927 | 1.4892810  | 5.2087673  |
| H | -4.2947473 | 0.0437475  | 4.4460749  |
| H | 1.7349082  | 3.9293933  | -0.4522330 |
| H | 0.3612625  | 3.8036501  | -1.6153220 |
| H | 2.1239608  | 4.6069867  | -2.7553066 |
| H | 3.3655496  | 4.1052902  | -3.9115325 |
| H | 4.6527127  | 6.2475536  | -3.2722466 |
| H | 3.3453121  | 6.6283288  | -2.0990627 |
| H | 3.5990433  | 0.6808909  | -2.8289880 |
| H | 4.3815677  | 1.9913989  | -3.7682389 |
| H | 1.6647562  | 0.6778318  | -4.4076104 |
| H | 3.6212450  | -0.8784211 | -4.7334248 |

|   |            |            |            |
|---|------------|------------|------------|
| H | 4.4394926  | 0.3439873  | -5.7667376 |
| H | -0.0296671 | 6.9818546  | 4.6919817  |
| H | -5.8856547 | 0.6557501  | 3.8693261  |
| H | 5.0519705  | 6.5391093  | -1.5507639 |
| H | 2.9108437  | -0.4088073 | -6.3154306 |
| H | -1.0401149 | 3.0366392  | -6.1212506 |
| H | -8.3219240 | 1.6869726  | -2.6950587 |
| H | -6.1886896 | -3.6659384 | 4.5649666  |
| H | 2.0945939  | -5.8933413 | 3.5275127  |
| H | 3.3280315  | 4.7953277  | 3.5214658  |
| H | 7.0499756  | -2.3290431 | 4.9387777  |
| H | 3.2066571  | -7.7291924 | -1.6865154 |
| H | -2.0240677 | -2.5542304 | -6.2780792 |
| C | 5.5007097  | 3.8425701  | -2.0633755 |
| H | 5.4322790  | 2.7700106  | -1.7761642 |
| H | 5.8955542  | 3.9016565  | -3.1031803 |
| H | 6.2601521  | 4.3121396  | -1.4014254 |
| C | 2.3556042  | 2.2499547  | -5.7293263 |
| H | 3.2976632  | 2.7271224  | -6.0831991 |
| H | 1.8287477  | 1.8675184  | -6.6304752 |
| H | 1.7100728  | 3.0400583  | -5.2853761 |
| C | 0.6043777  | -3.3000980 | -5.7666228 |
| H | 0.5762992  | -4.3597787 | -6.1088283 |
| H | 0.4855834  | -2.6650986 | -6.6712531 |
| H | 1.6170637  | -3.0933399 | -5.3552556 |
| C | 0.6086441  | -6.8043661 | -2.0599778 |
| H | 0.4095774  | -7.1917783 | -3.0848969 |
| H | 0.6820747  | -7.6871863 | -1.3887520 |
| H | -0.2753484 | -6.2141405 | -1.7319231 |
| C | 4.4329323  | -2.5023916 | 3.9930086  |
| H | 3.3647936  | -2.1923615 | 3.9353409  |
| H | 4.6429213  | -3.2169407 | 3.1633926  |
| H | 4.5588308  | -3.0659401 | 4.9424546  |
| C | 5.0510293  | 3.0032429  | 2.2517109  |
| H | 5.1011350  | 4.0369015  | 1.8445568  |
| H | 5.8540681  | 2.9203326  | 3.0190158  |
| H | 5.2957692  | 2.3090542  | 1.4171782  |
| C | -0.7474495 | 4.3924978  | 5.4046428  |
| H | -1.6900264 | 4.5979549  | 5.9612029  |
| H | -0.5975534 | 3.2909773  | 5.3656496  |
| H | 0.0837453  | 4.8160859  | 6.0090139  |
| C | -5.0276347 | 3.1292817  | 2.9234776  |
| H | -6.0403869 | 2.8388776  | 2.5687246  |
| H | -5.1715327 | 3.7504309  | 3.8367732  |
| H | -4.5776751 | 3.7718743  | 2.1340830  |
| C | -0.4966224 | -6.1830416 | 2.5508568  |

|   |            |            |            |
|---|------------|------------|------------|
| H | 0.2233722  | -6.9225210 | 2.1375727  |
| H | -0.9800623 | -6.6630369 | 3.4318946  |
| H | -1.2763406 | -6.0161015 | 1.7752926  |
| C | -3.5541405 | -3.1050893 | 5.2645428  |
| H | -3.2823306 | -4.0552167 | 5.7783002  |
| H | -2.6534884 | -2.4526131 | 5.2380105  |
| H | -4.3098635 | -2.5971011 | 5.9018624  |
| C | -6.1711666 | 1.5606208  | -0.9360101 |
| H | -6.4377534 | 0.5699290  | -0.4982797 |
| H | -5.1960027 | 1.8900377  | -0.5092936 |
| H | -6.9399303 | 2.2828423  | -0.5862202 |
| C | -2.8982924 | 1.0055856  | -5.7301919 |
| H | -3.8133084 | 1.4924499  | -6.1372408 |
| H | -2.2137248 | 0.8340826  | -6.5892502 |
| H | -3.1816557 | 0.0047278  | -5.3354844 |
